# Supplementary material for: Ancestral centriole and flagella proteins identified by analysis ofNaegleriadifferentiation
Source: Oxford University Press journal article supplement (doi:10.1242/jcs.077453), 2010-11-02
Supplement: jcs077453tables1.pdf [file jcs077453tables1.pdf]

Table S1. Flagellar enriched gene cluster

| Predicted function                           | JGI Peptide ID | Proteomics Hit   | Predicted homolog                                   |
|----------------------------------------------|----------------|------------------|-----------------------------------------------------|
| <b>IFT<br/>(Intraflagellar transport)</b>    | 79669          |                  | FLA3/Kinesin-associated protein 3                   |
|                                              | 63939          |                  | FLA2/FLA8 (kinesin 2 homolog)                       |
|                                              | 62977          |                  | IFT20                                               |
|                                              | 77715          |                  | IFT52                                               |
|                                              | 45002          | Yes              | IFT57                                               |
|                                              | 77945          |                  | IFT80                                               |
|                                              | 63280          | Yes              | IFT88                                               |
|                                              | 71180          |                  | IFT122                                              |
|                                              | 48798          |                  | IFT140                                              |
| <b>BBS<br/>(Transport to flagellar base)</b> | 65179          |                  | BBS1                                                |
|                                              | 71257          |                  | BBS2                                                |
|                                              | 44202          |                  | BBS3                                                |
|                                              | 28891          |                  | BBS4                                                |
|                                              | 34252          |                  | BBS5                                                |
|                                              | 68114          |                  | BBS7                                                |
|                                              | 80979          |                  | BBS8                                                |
|                                              | 80972          |                  | BBS9                                                |
| <b>Structural components</b>                 | 39221          | Yes              | Alpha-tubulin                                       |
|                                              | 56065          |                  | Alpha-tubulin                                       |
|                                              | 56236          |                  | Alpha-tubulin                                       |
|                                              | 83350          |                  | Beta-tubulin                                        |
|                                              | 55423          | Yes              | Beta-tubulin                                        |
|                                              | 56391          |                  | Beta-tubulin                                        |
|                                              | 78637          |                  | ODA9 (outer arm dynein intermediate chain)          |
|                                              | 80259          | Yes              | D1bLIC (dynein light intermediate chain)            |
|                                              | 81548          | Yes              | ODA1 (p66 outer dynein arm docking complex protein) |
|                                              | 30532          |                  | ODA12                                               |
|                                              | 81047          | Yes              | RIB72                                               |
|                                              | 83064          | Yes              | RIB43A-domain containing protein                    |
|                                              | 49798          | Yes              | Radial spoke protein 4                              |
|                                              | 44954          | Yes              | Radial spoke-head-like                              |
|                                              | 30562          | Yes              | PF16                                                |
|                                              | 952            |                  | PF20/SPG16                                          |
|                                              | 82851          | Yes              | PACRG                                               |
|                                              | 55564          |                  | Flagellar calmodulin (CAM1)                         |
| 64648                                        |                | KLP1 (kinesin-9) |                                                     |
| <b>General MT associated</b>                 | 72175          | Yes              | Katanan P80                                         |
|                                              | 83220          |                  | katanin p60                                         |
|                                              | 62120          |                  | CLASP-like                                          |
|                                              | 71898          |                  | DIP13                                               |
|                                              | 64818          | Yes              | XRP2                                                |
| <b>FAPP</b>                                  | 4601           | Yes              | FAP9                                                |
|                                              | 50227          |                  | FAP14                                               |
|                                              | 62998          |                  | FAP22                                               |

|                |       |     |                                                                         |
|----------------|-------|-----|-------------------------------------------------------------------------|
|                | 81229 |     | FAP32                                                                   |
|                | 67854 | Yes | FAP45                                                                   |
|                | 68117 |     | FAP50                                                                   |
|                | 59637 | Yes | FAP52                                                                   |
|                | 380   | Yes | FAP59                                                                   |
|                | 50399 |     | FAP60                                                                   |
|                | 73596 |     | FAP61                                                                   |
|                | 29690 |     | FAP66                                                                   |
|                | 33146 |     | FAP67                                                                   |
|                | 62358 |     | FAP69                                                                   |
|                | 70274 |     | FAP70                                                                   |
|                | 79290 |     | FAP82                                                                   |
|                | 46605 | Yes | FAP91                                                                   |
|                | 79626 | Yes | FAP116                                                                  |
|                | 32701 |     | FAP118.                                                                 |
|                | 74561 |     | FAP134                                                                  |
|                | 65873 |     | FAP161                                                                  |
|                | 61993 |     | FAP259                                                                  |
|                | 54982 |     | FAP253                                                                  |
|                | 29188 | Yes | FAP251                                                                  |
| <b>Unknown</b> | 32341 |     | Kinase                                                                  |
|                | 66608 |     | Guanylate cyclase                                                       |
|                | 63921 |     | MOT17                                                                   |
|                | 56610 |     | MOT25                                                                   |
|                | 73917 |     | MOT51                                                                   |
|                | 63091 | Yes | SSA4                                                                    |
|                | 67046 |     | SSA20 (chymotrypsin-like domain)                                        |
|                | 74042 |     | Leucine-rich repeats                                                    |
|                | 56805 |     | Unknown                                                                 |
|                | 60926 |     | RABL2A                                                                  |
|                | 79456 | Yes | ARL3                                                                    |
|                | 68064 |     | ARL13                                                                   |
| <b>Other</b>   | 80690 |     | DYF13                                                                   |
|                | 56340 |     | POC7/UNC119/HRG4.                                                       |
|                | 29950 |     | Nucleoside diphosphate kinase<br>(flagellate-specific domain structure) |
|                | 69688 | Yes | DPY30                                                                   |
|                | 78184 |     | FKB12                                                                   |
|                | 78645 | Yes | PDE14                                                                   |

Genes contained in the flagella-enriched gene cluster are classified by predicted function (left).

Gene information for each protein ID in the second column can be found at: <http://genome.jgi-psf.org/NaeGr1/NaeGr1.home.html>. Genes with hits in the proteomic analysis of *Naegleria* flagella are indicated in the second column with a “Yes”. Predicted orthologs of each gene are listed on the far right.
