# Supplementary material for: Ancestral centriole and flagella proteins identified by analysis ofNaegleriadifferentiation
Source: Oxford University Press journal article supplement (doi:10.1242/jcs.077453), 2010-11-02
Supplement: jcs077453tables2.pdf [file jcs077453tables2.pdf]

## Table S2. Proteomics analysis of *Naegleria flagella*

The *Naegleria* JGI protein ID and the number of peptides with strong confidence. *Naegleria* proteins that also belong to the FM gene set are indicated by a "Yes". The *Chlamydomonas* JGI protein ID for the top blast hit to version 4 of the *Chlamydomonas* genome and the NCBI accession for the top blast hit to the human genome, and corresponding e-values are given. The designation "nf" is used to indicate that no homolog with a e-value less than 1e-5 was identified. Pfam protein domain predictions for the *Naegleria* protein are based on version 24 of the Pfam database using gathering thresholds. For proteins with multiple Pfam domains, domains are listed sequentially, separated by a vertical line.

| Naegleria protein ID | No. peptides | FM gene family member | Chlamydomonas top Blast hit | Chlamydomonas e-value | Human top blast hit | Human e-value | Human blast hit description                        | Naegleria protein Pfam domains                                                                                                                                                                                                                                              |
|----------------------|--------------|-----------------------|-----------------------------|-----------------------|---------------------|---------------|----------------------------------------------------|-----------------------------------------------------------------------------------------------------------------------------------------------------------------------------------------------------------------------------------------------------------------------------|
| 55423                | 71           |                       | 129876                      | 3.80E-217             | NP_006079.1         | 1.70E-211     | tubulin, beta, 2                                   | PF00091: Tubulin/FtsZ, GTPase   PF03953: Tubulin/FtsZ, C-terminal                                                                                                                                                                                                           |
| 39221                | 38           |                       | 128523                      | 7.90E-217             | NP_006000.2         | 3.90E-205     | tubulin, alpha 1a                                  | PF00091: Tubulin/FtsZ, GTPase   PF03953: Tubulin/FtsZ, C-terminal                                                                                                                                                                                                           |
| 80962                | 22           |                       | 150766                      | 1.90E-76              | NP_904325.2         | 1.70E-117     | kinesin family member 1B isoform alpha             | PF00225: Kinesin, motor region   PF00498: Forkhead-associated                                                                                                                                                                                                               |
| 56359                | 22           |                       | nf                          | n/a                   | NP_003079.1         | 1.40E-10      | fascin 1                                           | PF06268: Fascin                                                                                                                                                                                                                                                             |
| 61055                | 13           |                       | 24114                       | 1.80E-61              | NP_001091.1         | 3.70E-120     | actin, alpha 1, skeletal muscle                    | PF00022: Actin/actin-like                                                                                                                                                                                                                                                   |
| 55913                | 13           |                       | 132905                      | 6.30E-89              | NP_001393.1         | 1.10E-170     | eukaryotic translation elongation factor 1 alpha 1 | PF00009: Protein synthesis factor, GTP-binding   PF03144: Translation elongation factor EFTu/EF1A, domain 2   PF03143: Translation elongation factor EFTu/EF1A, C-terminal                                                                                                  |
| 88138                | 12           |                       | 24114                       | 1.20E-85              | NP_001605.1         | 4.20E-176     | actin, gamma 1 propeptide                          | PF00022: Actin/actin-like                                                                                                                                                                                                                                                   |
| 56300                | 11           |                       | 134171                      | 2.20E-299             | NP_009057.1         | 5.40E-302     | valosin-containing protein                         | PF02359: AAA ATPase VAT, N-terminal   PF02933: Cell division protein 48, CDC48, domain 2   PF00004: AAA ATPase, core   PF00004: AAA ATPase, core                                                                                                                            |
| 50528                | 11           |                       | 145401                      | 5.20E-19              | NP_997200.1         | 7.70E-26      | zinc finger protein 474                            | nf                                                                                                                                                                                                                                                                          |
| 55628                | 11           | Yes                   | 130849                      | 0                     | XP_002345123.1      | 0             | PREDICTED: dynein, axonemal, heavy chain 17        | PF08385: Dynein heavy chain, N-terminal region 1   PF08393: Dynein heavy chain, N-terminal region 2   PF07728: ATPase associated with various cellular activities, AAA-5   PF07728: ATPase associated with various cellular activities, AAA-5   PF03028: Dynein heavy chain |
| 58174                | 10           |                       | 196241                      | 7.00E-10              | NP_001107829.1      | 1.30E-10      | hypothetical protein LOC441054                     | nf                                                                                                                                                                                                                                                                          |
| 56244                | 10           |                       | 16794                       | 5.20E-11              | NP_116243.2         | 6.00E-97      | coronin 6                                          | PF08953: Domain of unknown function DUF1899   PF00400: WD40 repeat   PF00400: WD40 repeat   PF08954: Domain of unknown function DUF1900                                                                                                                                     |
| 56254                | 10           |                       | 24524                       | 8.20E-270             | NP_001952.1         | 3.40E-277     | eukaryotic translation elongation factor 2         | PF00009: Protein synthesis factor, GTP-binding   PF03144: Translation elongation factor EFTu/EF1A, domain 2   PF03764: Translation elongation factor EFG/EF2, domain IV   PF00679: Translation elongation factor EFG/EF2, C-terminal                                        |
| 35692                | 9            |                       | 129809                      | 3.40E-35              | NP_150254.1         | 9.60E-35      | ribosomal protein L13                              | PF01294: Ribosomal protein L13e                                                                                                                                                                                                                                             |
| 78965                | 9            |                       | 132719                      | 1.20E-16              | NP_659482.3         | 1.10E-25      | coiled-coil domain containing 151                  | nf                                                                                                                                                                                                                                                                          |
| 81126                | 9            |                       | nf                          | n/a                   | nf                  | n/a           | nf                                                 | nf                                                                                                                                                                                                                                                                          |
| 59363                | 9            |                       | 206694                      | 2.30E-201             | NP_057392.1         | 3.00E-42      | UMP-CMP kinase 1 isoform a                         | PF01326: Pyruvate phosphate dikinase, PEP/pyruvate-binding   PF00391: PEP-utilising enzyme, mobile region   PF02896: PEP-utilizing enzyme   PF00406: Adenylate kinase                                                                                                       |
| 44741                | 8            |                       | 185673                      | 1.60E-211             | NP_006588.1         | 2.40E-221     | heat shock 70kDa protein 8 isoform 1               | PF00012: Heat shock protein 70                                                                                                                                                                                                                                              |
| 69418                | 8            |                       | 342942                      | 1.90E-39              | NP_004046.2         | 9.00E-55      | calpain 5                                          | PF00648: Peptidase C2, calpain   PF01067: Peptidase C2, calpain                                                                                                                                                                                                             |
| 70087                | 8            |                       | 137559                      | 2.00E-23              | NP_570967.1         | 7.40E-28      | dynein, light chain, roadblock-type 2              | PF03259: Roadblock/LC7                                                                                                                                                                                                                                                      |
| 56405                | 8            |                       | 185673                      | 2.30E-217             | NP_006588.1         | 1.90E-228     | heat shock 70kDa protein 8 isoform 1               | PF00012: Heat shock protein 70                                                                                                                                                                                                                                              |
| 82851                | 7            | Yes                   | 97201                       | 3.50E-65              | NP_001073847.1      | 1.30E-60      | parkin co-regulated gene protein isoform 2         | PF10274: ParcG                                                                                                                                                                                                                                                              |
| 35785                | 7            |                       | 172406                      | 8.80E-76              | NP_150644.1         | 2.20E-74      | ribosomal protein L8                               | PF00181: Ribosomal protein L2   PF03947: Ribosomal protein L2                                                                                                                                                                                                               |
| 30562                | 7            | Yes                   | 103782                      | 3.60E-118             | NP_036575.1         | 1.20E-132     | sperm associated antigen 6 isoform 1               | PF00514: Armadillo   PF00514: Armadillo   PF02985: HEAT   PF00514: Armadillo                                                                                                                                                                                                |
| 82397                | 6            |                       | 96566                       | 4.90E-66              | NP_008965.2         | 1.30E-69      | DnaJ (Hsp40) homolog, subfamily B, member 4        | PF00226: Heat shock protein DnaJ, N-terminal   PF01556: Chaperone DnaJ, C-terminal                                                                                                                                                                                          |
| 59029                | 6            |                       | nf                          | n/a                   | nf                  | n/a           | nf                                                 | PF00736: Translation elongation factor EF1B, beta and delta chains, guanine nucleotide exchange                                                                                                                                                                             |
| 81457                | 6            |                       | 408539                      | 4.40E-15              | NP_001400.3         | 3.60E-36      | EGF-like-domain, multiple 3                        | PF07974: EGF, extracellular   PF02010: PKD/REJ-like protein                                                           |
| 81553                | 6            |                       | nf                          | n/a                   | nf                  | n/a           | nf                                                 | nf                                                                                                                                                                                                                                                                          |

|       |   |     |        |           |                |           |                                              |                                                                                                                                                                                                                                                                                               |
|-------|---|-----|--------|-----------|----------------|-----------|----------------------------------------------|-----------------------------------------------------------------------------------------------------------------------------------------------------------------------------------------------------------------------------------------------------------------------------------------------|
| 39465 | 5 |     | 138697 | 3.20E-46  | NP_000967.1    | 2.20E-53  | ribosomal protein L12                        | PF03946: Ribosomal protein L11   PF00298: Ribosomal protein L11                                                                                                                                                                                                                               |
| 78704 | 5 | Yes | 116240 | 0         | NP_116210.2    | 0         | hydrocephalus inducing isoform a             | nf                                                                                                                                                                                                                                                                                            |
| 81047 | 5 | Yes | 126286 | 1.30E-99  | NP_060570.2    | 1.10E-102 | EF-hand domain (C-terminal) containing 1     | PF06565: Protein of unknown function DUF1126   PF06565: Protein of unknown function DUF1126   PF06565: Protein of unknown function DUF1126                                                                                                                                                    |
| 83254 | 5 |     | 181887 | 8.50E-07  | nf             | n/a       | nf                                           | PF00235: Profilin/allergen                                                                                                                                                                                                                                                                    |
| 56516 | 5 |     | 150605 | 4.10E-14  | NP_055111.1    | 3.70E-16  | calpain 7                                    | PF00648: Peptidase C2, calpain                                                                                                                                                                                                                                                                |
| 77087 | 5 |     | 182408 | 3.70E-52  | NP_000420.1    | 1.40E-56  | methionine adenosyltransferase I, alpha      | PF02773: S-adenosylmethionine synthetase                                                                                                                                                                                                                                                      |
| 58590 | 5 |     | 9715   | 4.00E-08  | NP_002464.1    | 7.20E-11  | myosin, heavy polypeptide 9, non-muscle      | nf                                                                                                                                                                                                                                                                                            |
| 80070 | 5 |     | 57302  | 6.90E-12  | NP_001019.1    | 1.40E-12  | ribosomal protein S25                        | PF03297: S25 ribosomal protein   PF00376: Bacterial regulatory protein, MerR                                                                                                                                                                                                                  |
| 59812 | 4 |     | 398336 | 5.20E-16  | nf             | n/a       | nf                                           | nf                                                                                                                                                                                                                                                                                            |
| 60431 | 4 | Yes | 188612 | 1.20E-85  | NP_075462.3    | 4.80E-88  | dynein, axonemal, intermediate polypeptide 2 | nf                                                                                                                                                                                                                                                                                            |
| 56558 | 4 |     | 106571 | 5.40E-15  | NP_543136.1    | 5.70E-18  | testis-specific gene A2                      | PF02493: MORN motif   PF02493: MORN motif   PF02493: MORN motif                                                                                                                                                                                                                               |
| 82967 | 4 |     | 159282 | 1.20E-53  | NP_000969.1    | 3.40E-55  | ribosomal protein L23                        | PF00238: Ribosomal protein L14b/L23e                                                                                                                                                                                                                                                          |
| 80333 | 4 |     | 195598 | 9.60E-86  | NP_000959.2    | 2.10E-85  | ribosomal protein L4                         | PF00573: Ribosomal protein L4/L1e                                                                                                                                                                                                                                                             |
| 83065 | 4 |     | 158129 | 1.50E-87  | NP_005908.1    | 3.10E-100 | cytosolic malate dehydrogenase               | PF00056: Lactate/malate dehydrogenase   PF02866: Lactate/malate dehydrogenase                                                                                                                                                                                                                 |
| 44954 | 4 |     | 54360  | 1.10E-26  | NP_001010892.1 | 1.50E-35  | radial spoke head 4 homolog A isoform 1      | PF04712: Radial spokehead-like protein                                                                                                                                                                                                                                                        |
| 57391 | 4 |     | 118745 | 1.20E-92  | NP_005712.1    | 1.50E-118 | ARP3 actin-related protein 3 homolog         | PF00022: Actin/actin-like                                                                                                                                                                                                                                                                     |
| 37059 | 4 |     | 60432  | 0         | NP_997320.2    | 0         | dynein, axonemal, heavy chain 10             | PF08385: Dynein heavy chain, N-terminal region 1   PF08393: Dynein heavy chain, N-terminal region 2   PF07728: ATPase associated with various cellular activities, AAA-5   PF03028: Dynein heavy chain                                                                                        |
| 49798 | 4 | Yes | 24016  | 1.80E-27  | NP_001010892.1 | 6.20E-23  | radial spoke head 4 homolog A isoform 1      | PF04712: Radial spokehead-like protein                                                                                                                                                                                                                                                        |
| 78488 | 4 |     | 107530 | 8.30E-95  | NP_872270.1    | 4.70E-90  | pyruvate kinase, muscle isoform M1           | PF00224: Pyruvate kinase, barrel   PF02887: Pyruvate kinase, alpha/beta                                                                                                                                                                                                                       |
| 78559 | 4 | Yes | 130324 | 0         | NP_056327.4    | 0         | dynein, axonemal, heavy chain 1              | PF08393: Dynein heavy chain, N-terminal region 2   PF07728: ATPase associated with various cellular activities, AAA-5   PF07728: ATPase associated with various cellular activities, AAA-5   PF07728: ATPase associated with various cellular activities, AAA-5   PF03028: Dynein heavy chain |
| 44910 | 4 |     | 185571 | 2.80E-54  | NP_000933.1    | 5.10E-52  | peptidylprolyl isomerase B precursor         | PF00160: Peptidyl-prolyl cis-trans isomerase, cyclophilin-type                                                                                                                                                                                                                                |
| 31874 | 4 |     | 129362 | 9.20E-42  | NP_057392.1    | 7.20E-46  | UMP-CMP kinase 1 isoform a                   | PF00406: Adenylate kinase                                                                                                                                                                                                                                                                     |
| 82392 | 4 |     | 24114  | 9.40E-79  | NP_001605.1    | 2.00E-162 | actin, gamma 1 propeptide                    | PF00022: Actin/actin-like                                                                                                                                                                                                                                                                     |
| 63673 | 4 |     | nf     | n/a       | nf             | n/a       | nf                                           | nf                                                                                                                                                                                                                                                                                            |
| 81845 | 4 | Yes | 134599 | 0         | NP_061720.2    | 0         | dynein, axonemal, heavy chain 7              | PF08393: Dynein heavy chain, N-terminal region 2   PF07728: ATPase associated with various cellular activities, AAA-5   PF07728: ATPase associated with various cellular activities, AAA-5   PF03028: Dynein heavy chain                                                                      |
| 78928 | 4 |     | nf     | n/a       | nf             | n/a       | nf                                           | nf                                                                                                                                                                                                                                                                                            |
| 75449 | 4 |     | 128099 | 1.20E-190 | NP_068768.2    | 1.70E-170 | plasma membrane calcium ATPase 3 isoform 3a  | PF00122: E1-E2 ATPase-associated region   PF00702: Haloacid dehalogenase-like hydrolase   PF00689: ATPase, P-type cation-transporter, C-terminal                                                                                                                                              |
| 83145 | 4 |     | 179706 | 3.00E-43  | NP_001002.1    | 9.50E-44  | ribosomal protein S7                         | PF01251: Ribosomal protein S7E                                                                                                                                                                                                                                                                |
| 36356 | 4 |     | 195590 | 2.50E-46  | NP_000972.1    | 2.10E-46  | ribosomal protein L19                        | PF01280: Ribosomal protein L19e                                                                                                                                                                                                                                                               |
| 76335 | 3 |     | nf     | n/a       | NP_003079.1    | 2.50E-09  | fascin 1                                     | PF06268: Fascin                                                                                                                                                                                                                                                                               |
| 80069 | 3 |     | nf     | n/a       | nf             | n/a       | nf                                           | nf                                                                                                                                                                                                                                                                                            |
| 80996 | 3 |     | nf     | n/a       | nf             | n/a       | nf                                           | PF00036: Calcium-binding EF-hand                                                                                                                                                                                                                                                              |
| 55960 | 3 |     | 195602 | 2.70E-74  | NP_002943.2    | 1.20E-73  | ribosomal protein S2                         | PF00333: Ribosomal protein S5, N-terminal   PF03719: Ribosomal protein S5, C-terminal                                                                                                                                                                                                         |
| 35035 | 3 |     | 174711 | 5.90E-22  | NP_000975.2    | 3.20E-27  | ribosomal protein L23a                       | PF03939: Ribosomal protein L23, N-terminal   PF00276: Ribosomal protein L25/L23                                                                                                                                                                                                               |
| 78595 | 3 |     | 284442 | 3.40E-08  | nf             | n/a       | nf                                           | nf                                                                                                                                                                                                                                                                                            |
| 36068 | 3 |     | 182408 | 4.90E-130 | NP_005902.1    | 2.60E-135 | methionine adenosyltransferase II, alpha     | PF00438: S-adenosylmethionine synthetase   PF02772: S-adenosylmethionine synthetase   PF02773: S-adenosylmethionine synthetase                                                                                                                                                                |
| 79456 | 3 | Yes | 128761 | 1.00E-49  | NP_004302.1    | 2.70E-53  | ADP-ribosylation factor-like 3               | PF00025: ARF/SAR superfamily                                                                                                                                                                                                                                                                  |
| 80939 | 3 |     | 297279 | 1.00E-35  | NP_003960.1    | 2.10E-32  | ubiquitin-conjugating enzyme E2M             | PF00179: Ubiquitin-conjugating enzyme, E2                                                                                                                                                                                                                                                     |
| 62019 | 3 |     | nf     | n/a       | nf             | n/a       | nf                                           | nf                                                                                                                                                                                                                                                                                            |
| 56829 | 3 |     | 402056 | 9.10E-42  | NP_006357.1    | 1.40E-58  | adenylyl cyclase-associated protein 2        | PF01213: Adenylate cyclase-associated CAP, N-terminal   PF08603: Adenylate cyclase-associated CAP, C-terminal                                                                                                                                                                                 |

|       |   |     |        |           |                |           |                                                             |                                                                                                                                                                                                                                                         |
|-------|---|-----|--------|-----------|----------------|-----------|-------------------------------------------------------------|---------------------------------------------------------------------------------------------------------------------------------------------------------------------------------------------------------------------------------------------------------|
| 78686 | 3 |     | 107474 | 8.60E-156 | NP_006421.2    | 4.10E-153 | chaperonin containing TCP1, subunit 4 (delta)               | PF00118: Chaperonin Cpn60/TCP-1                                                                                                                                                                                                                         |
| 2066  | 3 | Yes | 192295 | 5.90E-38  | NP_699207.1    | 2.50E-31  | coiled-coil domain containing 96                            | nf                                                                                                                                                                                                                                                      |
| 66931 | 3 |     | nf     | n/a       | nf             | n/a       | nf                                                          | nf                                                                                                                                                                                                                                                      |
| 78645 | 3 | Yes | 101278 | 7.10E-58  | NP_006194.2    | 4.90E-63  | phosphodiesterase 4D isoform 2                              | PF00233: 3'5'-cyclic nucleotide phosphodiesterase                                                                                                                                                                                                       |
| 81548 | 3 | Yes | 132719 | 2.40E-57  | NP_689804.1    | 8.50E-35  | coiled-coil domain containing 63                            | nf                                                                                                                                                                                                                                                      |
| 56285 | 3 |     | 188144 | 5.30E-15  | NP_004915.2    | 2.10E-110 | actinin, alpha 4                                            | PF00307: Calponin-like actin-binding   PF00307: Calponin-like actin-binding   PF00435: Spectrin repeat   PF00036: Calcium-binding EF-hand   PF00036: Calcium-binding EF-hand   PF08726: EF-hand, Ca insensitive                                         |
| 34423 | 3 |     | nf     | n/a       | NP_006127.1    | 1.70E-44  | capping protein (actin filament) muscle Z-line, alpha 2     | PF01267: F-actin capping protein, alpha subunit                                                                                                                                                                                                         |
| 64186 | 3 |     | 182635 | 3.70E-08  | NP_114122.2    | 9.30E-08  | ropporin 1-like                                             | nf                                                                                                                                                                                                                                                      |
| 81906 | 3 |     | 195587 | 3.20E-55  | NP_000966.2    | 4.70E-58  | ribosomal protein L11                                       | PF00281: Ribosomal protein L5   PF00673: Ribosomal protein L5                                                                                                                                                                                           |
| 82992 | 3 |     | 83064  | 2.30E-91  | NP_001966.1    | 6.50E-84  | enolase 2                                                   | PF03952: Enolase   PF00113: Enolase                                                                                                                                                                                                                     |
| 67854 | 3 | Yes | 206096 | 6.90E-44  | NP_036469.2    | 4.20E-29  | nasopharyngeal epithelium specific protein 1                | nf                                                                                                                                                                                                                                                      |
| 58587 | 3 |     | 183782 | 3.10E-73  | NP_000960.2    | 2.50E-84  | ribosomal protein L5                                        | PF00861: Ribosomal protein L18P/L5E                                                                                                                                                                                                                     |
| 81952 | 3 |     | 192162 | 2.10E-33  | NP_005960.1    | 4.00E-29  | nucleosome assembly protein 1-like 4                        | PF00956: Nucleosome assembly protein (NAP)                                                                                                                                                                                                              |
| 60866 | 3 |     | 136865 | 3.60E-70  | NP_002852.1    | 1.70E-76  | phosphate cytidyltransferase 2, ethanolamine                | PF01467: Cytidyltransferase   PF01467: Cytidyltransferase                                                                                                                                                                                               |
| 56310 | 3 |     | 180130 | 5.50E-35  | NP_001006.1    | 6.80E-34  | ribosomal protein S11                                       | PF00366: Ribosomal protein S17                                                                                                                                                                                                                          |
| 81218 | 3 |     | 132210 | 1.00E-95  | NP_000282.1    | 4.40E-117 | phosphoglycerate kinase 1                                   | PF00162: Phosphoglycerate kinase                                                                                                                                                                                                                        |
| 35538 | 3 |     | 195613 | 1.40E-15  | NP_003320.2    | 1.90E-20  | thioredoxin                                                 | PF00085: Thioredoxin domain                                                                                                                                                                                                                             |
| 77219 | 3 |     | 138493 | 5.40E-163 | NP_005539.1    | 1.70E-163 | lysyl-tRNA synthetase isoform 2                             | PF01336: Nucleic acid binding, OB-fold, tRNA/helicase-type   PF00152: Aminoacyl-tRNA synthetase, class II (D, K and N)                                                                                                                                  |
| 82731 | 3 |     | 196567 | 7.70E-132 | NP_002159.2    | 6.70E-130 | isocitrate dehydrogenase 2 (NADP+), mitochondrial precursor | PF00180: Isocitrate/isopropylmalate dehydrogenase                                                                                                                                                                                                       |
| 57012 | 3 |     | 168484 | 9.50E-47  | NP_000997.1    | 6.70E-43  | ribosomal protein S3a                                       | PF01015: Ribosomal protein S3Ae                                                                                                                                                                                                                         |
| 61583 | 3 |     | nf     | n/a       | nf             | n/a       | nf                                                          | nf                                                                                                                                                                                                                                                      |
| 68583 | 3 |     | nf     | n/a       | nf             | n/a       | nf                                                          | nf                                                                                                                                                                                                                                                      |
| 59268 | 3 |     | 152943 | 8.20E-06  | nf             | n/a       | nf                                                          | nf                                                                                                                                                                                                                                                      |
| 67893 | 2 |     | nf     | n/a       | NP_001138890.1 | 6.60E-10  | tetratricopeptide repeat domain 28                          | nf                                                                                                                                                                                                                                                      |
| 77772 | 2 |     | 188942 | 7.40E-63  | NP_037396.3    | 5.20E-75  | DEAD (Asp-Glu-Ala-Asp) box polypeptide 25                   | PF00270: DNA/RNA helicase, DEAD/DEAH box type, N-terminal   PF00271: DNA/RNA helicase, C-terminal                                                                                                                                                       |
| 59931 | 2 |     | 166203 | 1.90E-13  | NP_689993.1    | 1.10E-06  | MAP7 domain containing 2                                    | nf                                                                                                                                                                                                                                                      |
| 77735 | 2 |     | 295585 | 2.30E-66  | NP_064502.9    | 1.40E-264 | leucyl-tRNA synthetase                                      | PF09334: Aminoacyl-tRNA synthetase, class I (M)   PF08264: Valyl/Leucyl/Isoleucyl-tRNA synthetase, class I, anticodon-binding                                                                                                                           |
| 67441 | 2 |     | nf     | n/a       | nf             | n/a       | nf                                                          | nf                                                                                                                                                                                                                                                      |
| 82648 | 2 |     | 195597 | 5.40E-12  | NP_378669.1    | 9.80E-10  | ribosomal protein L36                                       | PF01158: Ribosomal protein L36E                                                                                                                                                                                                                         |
| 69163 | 2 |     | 58843  | 2.00E-110 | NP_005897.1    | 4.50E-108 | male germ cell-associated kinase                            | PF00069: Protein kinase, core                                                                                                                                                                                                                           |
| 80491 | 2 |     | nf     | n/a       | nf             | n/a       | nf                                                          | nf                                                                                                                                                                                                                                                      |
| 55929 | 2 |     | 127904 | 1.40E-178 | NP_005989.3    | 7.00E-174 | chaperonin containing TCP1, subunit 3 isoform a             | PF00118: Chaperonin Cpn60/TCP-1                                                                                                                                                                                                                         |
| 70276 | 2 |     | nf     | n/a       | NP_115509.4    | 8.30E-06  | Myc-binding protein-associated protein                      | nf                                                                                                                                                                                                                                                      |
| 58709 | 2 |     | 195595 | 3.80E-11  | NP_000986.2    | 4.90E-08  | ribosomal protein L34                                       | PF01199: Ribosomal protein L34e                                                                                                                                                                                                                         |
| 37563 | 2 |     | 128522 | 3.00E-82  | NP_006316.1    | 1.80E-90  | ras-related nuclear protein                                 | PF00071: Ras                                                                                                                                                                                                                                            |
| 75565 | 2 |     | 187517 | 6.60E-24  | NP_003986.2    | 7.50E-24  | natriuretic peptide receptor B precursor                    | PF00989: PAS fold   PF00211: Adenylyl cyclase class-3/4/guanylyl cyclase                                                                                                                                                                                |
| 81386 | 2 |     | nf     | n/a       | NP_116164.2    | 4.30E-08  | kelch-like                                                  | PF00651: BTB/POZ                                                                                                                                                                                                                                        |
| 82381 | 2 |     | 402056 | 1.40E-17  | NP_006357.1    | 1.70E-25  | adenylyl cyclase-associated protein 2                       | PF08603: Adenylate cyclase-associated CAP, C-terminal                                                                                                                                                                                                   |
| 53883 | 2 |     | 140618 | 8.70E-108 | NP_002037.2    | 1.30E-110 | glyceraldehyde-3-phosphate dehydrogenase                    | PF00044: Glyceraldehyde 3-phosphate dehydrogenase   PF02800: Glyceraldehyde 3-phosphate dehydrogenase                                                                                                                                                   |
| 64917 | 2 |     | nf     | n/a       | nf             | n/a       | nf                                                          | nf                                                                                                                                                                                                                                                      |
| 74744 | 2 |     | nf     | n/a       | nf             | n/a       | nf                                                          | nf                                                                                                                                                                                                                                                      |
| 56509 | 2 |     | 77886  | 2.20E-35  | NP_776254.2    | 9.10E-37  | MORN repeat containing 3                                    | PF00225: Kinesin, motor region   PF02493: MORN motif                                                                                      |
| 72250 | 2 |     | 58944  | 5.60E-49  | NP_001018146.1 | 1.10E-47  | NME1-NME2 protein                                           | PF00334: Nucleoside diphosphate kinase, core                                                                                                                                                                                                            |
| 79690 | 2 |     | 395908 | 2.00E-07  | NP_006624.2    | 3.20E-88  | IQ motif containing GTPase activating protein 2             | PF00307: Calponin-like actin-binding   PF00630: Filamin/ABP280 repeat   PF00630: Filamin/ABP280 repeat   PF00630: Filamin/ABP280 repeat   PF00630: Filamin/ABP280 repeat   PF00616: Ras GTPase-activating protein   PF03836: RasGAP protein, C-terminal |

|       |   |     |        |           |                |           |                                                                              |                                                                                                                                                                                                                   |
|-------|---|-----|--------|-----------|----------------|-----------|------------------------------------------------------------------------------|-------------------------------------------------------------------------------------------------------------------------------------------------------------------------------------------------------------------|
| 55664 | 2 |     | 126382 | 8.30E-190 | NP_001684.2    | 1.40E-198 | vacuolar H <sup>+</sup> ATPase B2                                            | PF02874: ATPase, F1/V1/A1 complex, alpha/beta subunit, N-terminal   PF00006: ATPase, F1/V1/A1 complex, alpha/beta subunit, nucleotide-binding   PF00306: ATPase, F1/V1/A1 complex, alpha/beta subunit, C-terminal |
| 77798 | 2 |     | 376980 | 4.20E-122 | NP_004981.2    | 7.80E-98  | methionyl-tRNA synthetase                                                    | PF09334: Aminoacyl-tRNA synthetase, class I (M)   PF01588: t-RNA-binding region                                                                                                                                   |
| 64930 | 2 | Yes | 138046 | 1.10E-34  | NP_114130.3    | 6.20E-35  | radial spoke 3 homolog                                                       | PF06098: Radial spoke 3                                                                                                                                                                                           |
| 46570 | 2 |     | nf     | n/a       | nf             | n/a       | nf                                                                           | nf                                                                                                                                                                                                                |
| 82706 | 2 |     | 188837 | 1.10E-79  | NP_000998.1    | 1.10E-83  | ribosomal protein S4, X-linked X isoform                                     | PF08071: Ribosomal protein S4E, N-terminal   PF01479: RNA-binding S4   PF00900: Ribosomal protein S4E, central   PF00467: KOW                                                                                     |
| 63500 | 2 |     | 342942 | 2.10E-19  | NP_004046.2    | 1.70E-33  | calpain 5                                                                    | PF00515: Tetratricopeptide TPR_1   PF00648: Peptidase C2, calpain                                                                                                                                                 |
| 82819 | 2 |     | 131113 | 6.20E-185 | NP_036205.1    | 7.10E-181 | chaperonin containing TCP1, subunit 5 (epsilon)                              | PF00118: Chaperonin Cpn60/TCP-1                                                                                                                                                                                   |
| 82964 | 2 |     | 137286 | 3.00E-130 | NP_001885.1    | 2.20E-122 | casein kinase 1 epsilon                                                      | PF00069: Protein kinase, core                                                                                                                                                                                     |
| 80991 | 2 |     | 184001 | 3.00E-178 | NP_002794.1    | 3.40E-174 | proteasome 26S ATPase subunit 2                                              | PF00004: AAA ATPase, core                                                                                                                                                                                         |
| 64979 | 2 |     | 143072 | 1.70E-17  | NP_148982.1    | 1.80E-17  | ribosomal protein S24 isoform a                                              | PF01282: Ribosomal protein S24e                                                                                                                                                                                   |
| 60612 | 2 |     | 24114  | 1.60E-83  | NP_001092.1    | 2.50E-171 | beta actin                                                                   | PF00022: Actin/actin-like                                                                                                                                                                                         |
| 59586 | 2 |     | 129025 | 6.20E-30  | NP_002188.1    | 2.20E-266 | aconitase 1                                                                  | PF00330: Aconitate hydratase, N-terminal   PF00694: Aconitate hydratase, C-terminal                                                                                                                               |
| 69699 | 2 |     | 380616 | 1.00E-120 | NP_005947.3    | 1.30E-117 | methylenetetrahydrofolate dehydrogenase 1                                    | PF01268: Formate-tetrahydrofolate ligase, FTHFS                                                                                                                                                                   |
| 82759 | 2 |     | 195592 | 3.60E-38  | NP_001014.1    | 3.90E-38  | ribosomal protein S20 isoform 2                                              | PF00338: Ribosomal protein S10                                                                                                                                                                                    |
| 36339 | 2 |     | 188144 | 4.30E-35  | NP_008819.1    | 4.60E-35  | calmodulin 1                                                                 | PF00036: Calcium-binding EF-hand   PF00036: Calcium-binding EF-hand                                                                                                                                               |
| 66723 | 2 |     | nf     | n/a       | nf             | n/a       | nf                                                                           | PF00612: IQ calmodulin-binding region   PF00612: IQ calmodulin-binding region   PF00612: IQ calmodulin-binding region                                                                                             |
| 57212 | 2 |     | nf     | n/a       | nf             | n/a       | nf                                                                           | nf                                                                                                                                                                                                                |
| 29544 | 2 |     | 138117 | 1.70E-239 | NP_031381.2    | 5.90E-225 | heat shock 90kDa protein 1, beta                                             | PF02518: ATP-binding region, ATPase-like   PF00183: Heat shock protein Hsp90                                                                                                                                      |
| 82184 | 2 |     | 177203 | 7.80E-36  | NP_006400.2    | 3.00E-72  | actin related protein 2/3 complex subunit 1A                                 | PF00400: WD40 repeat   PF00400: WD40 repeat                                                                                                                                                                       |
| 59485 | 2 |     | nf     | n/a       | NP_003881.2    | 1.70E-07  | Fc fragment of IgG binding protein                                           | nf                                                                                                                                                                                                                |
| 74041 | 2 |     | nf     | n/a       | NP_004230.2    | 3.30E-11  | thyroid hormone receptor interactor 11                                       | nf                                                                                                                                                                                                                |
| 70498 | 2 |     | nf     | n/a       | nf             | n/a       | nf                                                                           | nf                                                                                                                                                                                                                |
| 80201 | 2 |     | nf     | n/a       | NP_004921.1    | 1.70E-67  | F-actin capping protein beta subunit                                         | PF01115: F-actin capping protein, beta subunit                                                                                                                                                                    |
| 80999 | 2 |     | 127247 | 3.10E-25  | NP_000987.2    | 2.60E-25  | ribosomal protein L35a                                                       | PF01247: Ribosomal protein L35Ae                                                                                                                                                                                  |
| 63284 | 2 |     | nf     | n/a       | NP_001034669.1 | 6.90E-06  | aster-associated protein                                                     | nf                                                                                                                                                                                                                |
| 36352 | 2 |     | 196616 | 8.10E-192 | nf             | n/a       | nf                                                                           | PF01326: Pyruvate phosphate dikinase, PEP/pyruvate-binding   PF00391: PEP-utilising enzyme, mobile region   PF02896: PEP-utilizing enzyme                                                                         |
| 66239 | 2 |     | 188056 | 4.10E-09  | XP_001722448.1 | 1.80E-32  | PREDICTED: hypothetical protein LOC285754                                    | nf                                                                                                                                                                                                                |
| 59818 | 2 |     | 185104 | 5.60E-134 | NP_004989.2    | 1.40E-239 | myosin IE                                                                    | PF00063: Myosin head, motor region   PF06017: Myosin tail 2   PF00018: Src homology-3                                                                                                                             |
| 69688 | 2 | Yes | 295278 | 1.00E-14  | NP_115963.1    | 4.70E-13  | dpy-30-like protein                                                          | PF05186: Dpy-30                                                                                                                                                                                                   |
| 59838 | 2 |     | 129593 | 1.00E-152 | NP_000678.1    | 7.70E-129 | adenosylhomocysteinase isoform 1                                             | PF05221: S-adenosyl-L-homocysteine hydrolase   PF00670: S-adenosyl-L-homocysteine hydrolase, NAD binding                                                                                                          |
| 38656 | 2 |     | 155464 | 3.10E-64  | NP_005800.3    | 1.00E-71  | peroxiredoxin 2 isoform a                                                    | PF00578: Alkyl hydroperoxide reductase/ Thiol specific antioxidant/ Mal allergen   PF10417: C-terminal domain of 1-Cys peroxiredoxin                                                                              |
| 70153 | 2 |     | 24114  | 1.10E-27  | NP_005713.1    | 1.90E-31  | actin-related protein 2 isoform b                                            | PF00022: Actin/actin-like                                                                                                                                                                                         |
| 82072 | 1 |     | 149311 | 1.70E-22  | NP_004805.2    | 7.70E-10  | WD repeat domain 57 (U5 snRNP specific)                                      | PF00400: WD40 repeat   PF00400: WD40 repeat   PF00400: WD40 repeat                                                                                                                                                |
| 49131 | 1 |     | nf     | n/a       | nf             | n/a       | nf                                                                           | nf                                                                                                                                                                                                                |
| 66413 | 1 |     | nf     | n/a       | nf             | n/a       | nf                                                                           | nf                                                                                                                                                                                                                |
| 79795 | 1 |     | nf     | n/a       | nf             | n/a       | nf                                                                           | PF02845: Ubiquitin system component Cue                                                                                                                                                                           |
| 63304 | 1 | Yes | 158948 | 3.60E-78  | NP_079039.3    | 2.10E-78  | WD repeat domain 78 isoform 1                                                | PF00400: WD40 repeat                                                                                                                                                                                              |
| 78218 | 1 |     | nf     | n/a       | NP_620073.2    | 2.10E-32  | guanine nucleotide binding protein, alpha activating polypeptide O isoform b | PF00503: Guanine nucleotide binding protein (G-protein), alpha subunit                                                                                                                                            |
| 80282 | 1 |     | nf     | n/a       | NP_001019837.1 | 1.20E-12  | SH3-domain kinase binding protein 1 isoform b                                | PF00018: Src homology-3   PF00018: Src homology-3                                                                                                                                                                 |
| 70994 | 1 |     | 97466  | 2.40E-54  | NP_004818.2    | 1.50E-40  | ATP-binding cassette, subfamily G, member 2                                  | PF00005: ABC transporter related   PF01061: ABC-2 type transporter                                                                                                                                                |
| 56722 | 1 |     | nf     | n/a       | nf             | n/a       | nf                                                                           | PF03114: BAR                                                                                                                                                                                                      |
| 59646 | 1 |     | 154307 | 1.80E-132 | nf             | n/a       | nf                                                                           | PF08267: Cobalamin (vitamin B12)-independent methionine synthase MetE, N-terminal   PF01717: Methionine synthase, vitamin-B12 independent                                                                         |

|       |   |     |        |           |                |           |                                                                |                                                                                                                                                                                                                          |
|-------|---|-----|--------|-----------|----------------|-----------|----------------------------------------------------------------|--------------------------------------------------------------------------------------------------------------------------------------------------------------------------------------------------------------------------|
| 82749 | 1 |     | 185012 | 9.10E-10  | NP_077747.1    | 9.70E-10  | AMP-activated protein kinase gamma2 subunit isoform b          | PF00571: Cystathionine beta-synthase, core                                                                                                                                                                               |
| 81242 | 1 |     | nf     | n/a       | NP_001014436.1 | 2.20E-08  | drebrin-like isoform b                                         | PF00241: Actin-binding, cofilin/tropomyosin type                                                                                                                                                                         |
| 81102 | 1 |     | nf     | n/a       | nf             | n/a       | nf                                                             | nf                                                                                                                                                                                                                       |
| 57099 | 1 |     | 159792 | 7.10E-10  | NP_001106673.1 | 7.50E-12  | nascent polypeptide-associated complex alpha subunit isoform b | PF01849: Nascent polypeptide-associated complex NAC                                                                                                                                                                      |
| 52995 | 1 |     | nf     | n/a       | nf             | n/a       | nf                                                             | nf                                                                                                                                                                                                                       |
| 35679 | 1 |     | 196624 | 1.80E-17  | NP_002618.1    | 1.00E-13  | phosphofructokinase, platelet                                  | PF00365: Phosphofructokinase                                                                                                                                                                                             |
| 49466 | 1 |     | nf     | n/a       | NP_001106678.1 | 4.40E-07  | putative thiosulfate sulfurtransferase KAT isoform 1           | PF00581: Rhodanese-like                                                                                                                                                                                                  |
| 59934 | 1 |     | 144027 | 2.10E-12  | NP_001035982.1 | 6.10E-46  | diaphanous homolog 3 isoform a                                 | PF06367: Diaphanous FH3   PF02181: Actin-binding FH2                                                                                                                                                                     |
| 59701 | 1 |     | 81593  | 2.70E-49  | NP_002801.1    | 2.00E-44  | proteasome 26S non-ATPase subunit 4                            | PF02809: Ubiquitin interacting motif                                                                                                                                                                                     |
| 79871 | 1 |     | nf     | n/a       | nf             | n/a       | nf                                                             | nf                                                                                                                                                                                                                       |
| 78090 | 1 |     | 106571 | 6.50E-26  | NP_001093167.1 | 1.60E-41  | radial spoke head 10 homolog B2                                | PF02493: MORN motif                                                                                        |
| 56657 | 1 |     | 206446 | 2.50E-09  | NP_055970.1    | 1.20E-24  | La ribonucleoprotein domain family, member 4B                  | PF05383: RNA-binding protein Lupus La                                                                                                                                                                                    |
| 63046 | 1 |     | nf     | n/a       | nf             | n/a       | nf                                                             | nf                                                                                                                                                                                                                       |
| 80379 | 1 |     | nf     | n/a       | nf             | n/a       | nf                                                             | nf                                                                                                                                                                                                                       |
| 59416 | 1 |     | 54608  | 4.20E-227 | NP_001681.2    | 1.80E-223 | ATPase, H+ transporting, lysosomal V1 subunit A                | PF02874: ATPase, F1/V1/A1 complex, alpha/beta subunit, N-terminal   PF00006: ATPase, F1/V1/A1 complex, alpha/beta subunit, nucleotide-binding   PF00306: ATPase, F1/V1/A1 complex, alpha/beta subunit, C-terminal        |
| 79158 | 1 |     | 196289 | 6.70E-23  | NP_006338.1    | 1.10E-18  | peptidylprolyl isomerase H                                     | PF00646: Cyclin-like F-box   PF00160: Peptidyl-prolyl cis-trans isomerase, cyclophilin-type                                                                                                                              |
| 81508 | 1 |     | nf     | n/a       | nf             | n/a       | nf                                                             | nf                                                                                                                                                                                                                       |
| 78159 | 1 |     | 154370 | 2.30E-07  | XP_001719981.1 | 7.80E-08  | PREDICTED: hypothetical protein, partial                       | nf                                                                                                                                                                                                                       |
| 66586 | 1 |     | nf     | n/a       | nf             | n/a       | nf                                                             | PF02204: Vacuolar sorting protein 9                                                                                                                                                                                      |
| 71918 | 1 |     | nf     | n/a       | nf             | n/a       | nf                                                             | nf                                                                                                                                                                                                                       |
| 66323 | 1 |     | nf     | n/a       | nf             | n/a       | nf                                                             | nf                                                                                                                                                                                                                       |
| 80683 | 1 |     | 195601 | 1.30E-40  | NP_001012.1    | 4.50E-37  | ribosomal protein S17                                          | PF00833: Ribosomal protein S17e                                                                                                                                                                                          |
| 59279 | 1 |     | 142494 | 1.90E-08  | NP_689540.2    | 1.30E-64  | adenylate kinase 7                                             | PF05186: Dpy-30                                                                                                                                                                                                          |
| 63128 | 1 |     | 196311 | 3.40E-43  | NP_005613.2    | 3.80E-56  | SA hypertension-associated homolog isoform 1                   | PF00501: AMP-dependent synthetase and ligase                                                                                                                                                                             |
| 75988 | 1 |     | 147457 | 4.30E-18  | nf             | n/a       | nf                                                             | PF00211: Adenylyl cyclase class-3/4/guanylyl cyclase                                                                                                                                                                     |
| 55119 | 1 |     | 302551 | 1.30E-47  | NP_000849.1    | 2.50E-50  | guanylate kinase 1 isoform b                                   | PF00625: Guanylate kinase                                                                                                                                                                                                |
| 79455 | 1 |     | nf     | n/a       | nf             | n/a       | nf                                                             | nf                                                                                                                                                                                                                       |
| 57833 | 1 |     | 117918 | 1.60E-14  | NP_997002.1    | 5.00E-08  | leucine rich repeat containing 20 isoform 1                    | PF00560: Leucine-rich repeat   PF00560: Leucine-rich repeat   PF00560: Leucine-rich repeat                                                                                                                               |
| 55855 | 1 |     | 132486 | 1.10E-139 | NP_002711.1    | 2.00E-146 | protein phosphatase 4, catalytic subunit                       | PF00149: Metallophosphoesterase                                                                                                                                                                                          |
| 46605 | 1 | Yes | 196748 | 9.30E-19  | NP_203528.2    | 1.30E-34  | AAT1-alpha                                                     | nf                                                                                                                                                                                                                       |
| 80103 | 1 |     | 60490  | 2.10E-17  | NP_036381.2    | 9.30E-37  | ras-like protein TC10                                          | PF00071: Ras                                                                                                                                                                                                             |
| 59104 | 1 |     | 126059 | 1.80E-59  | NP_001012321.1 | 1.20E-61  | ribosomal protein SA                                           | PF00318: Ribosomal protein S2                                                                                                                                                                                            |
| 67954 | 1 |     | nf     | n/a       | NP_001395.1    | 6.30E-15  | eukaryotic translation elongation factor 1 gamma               | PF00647: Translation elongation factor EF1B, gamma chain, conserved                                                                                                                                                      |
| 78187 | 1 |     | nf     | n/a       | NP_079413.3    | 5.40E-34  | spatacsin isoform 1                                            | nf                                                                                                                                                                                                                       |
| 52303 | 1 |     | 283187 | 9.40E-06  | NP_002896.2    | 4.50E-14  | retinol dehydrogenase 5 (11-cis and 9-cis)                     | nf                                                                                                                                                                                                                       |
| 80881 | 1 |     | nf     | n/a       | NP_859067.2    | 5.60E-23  | proline rich 6                                                 | PF04828: Glutathione-dependent formaldehyde-activating, GFA                                                                                                                                                              |
| 63912 | 1 |     | 400848 | 1.50E-34  | NP_005709.1    | 1.70E-53  | actin related protein 2/3 complex subunit 4 isoform a          | PF05856: ARP23 complex 20 kDa subunit                                                                                                                                                                                    |
| 49678 | 1 |     | nf     | n/a       | nf             | n/a       | nf                                                             | PF00036: Calcium-binding EF-hand                                                                                                                                                                                         |
| 81767 | 1 |     | 183518 | 1.70E-31  | NP_000961.2    | 1.30E-23  | ribosomal protein L6                                           | PF01159: Ribosomal protein L6E                                                                                                                                                                                           |
| 36459 | 1 |     | 129742 | 8.30E-16  | NP_001015.1    | 1.30E-14  | ribosomal protein S21                                          | PF01249: Ribosomal protein S21e                                                                                                                                                                                          |
| 71952 | 1 |     | nf     | n/a       | nf             | n/a       | nf                                                             | nf                                                                                                                                                                                                                       |
| 72942 | 1 |     | 342942 | 2.30E-12  | NP_008989.2    | 2.00E-18  | calpain 11                                                     | PF00648: Peptidase C2, calpain                                                                                                                                                                                           |
| 78714 | 1 |     | 134846 | 5.00E-42  | NP_000101.2    | 1.3E-314  | dihydropyrimidine dehydrogenase isoform 1                      | PF07992: FAD-dependent pyridine nucleotide-disulphide oxidoreductase   PF01180: Dihydroorotate dehydrogenase, core   PF00037: 4Fe-4S ferredoxin, iron-sulphur binding   PF00037: 4Fe-4S ferredoxin, iron-sulphur binding |
| 59622 | 1 |     | 115373 | 2.90E-13  | NP_057315.3    | 2.60E-13  | nemo like kinase                                               | PF07714: Tyrosine protein kinase                                                                                                                                                                                         |
| 50704 | 1 |     | nf     | n/a       | nf             | n/a       | nf                                                             | nf                                                                                                                                                                                                                       |
| 60003 | 1 |     | 284442 | 4.40E-15  | NP_115821.2    | 2.60E-39  | multiple EGF-like-domains 11                                   | PF07974: EGF, extracellular   PF07974: EGF, extracellular   PF07974: EGF, extracellular   PF07974: EGF, extracellular   PF00053: EGF-like, laminin   PF00053: EGF-like, laminin   PF02010: PKD/REJ-like protein          |
| 45594 | 1 |     | 194382 | 1.00E-159 | NP_036558.3    | 2.90E-287 | splicing factor 3b, subunit 3                                  | PF03178: CPSF A subunit, C-terminal                                                                                                                                                                                      |
| 63520 | 1 |     | nf     | n/a       | nf             | n/a       | nf                                                             | nf                                                                                                                                                                                                                       |
| 71766 | 1 |     | nf     | n/a       | nf             | n/a       | nf                                                             | nf                                                                                                                                                                                                                       |



|       |   |     |        |           |                |           |                                                                                         |                                                                                                                                                                                                                                                                   |
|-------|---|-----|--------|-----------|----------------|-----------|-----------------------------------------------------------------------------------------|-------------------------------------------------------------------------------------------------------------------------------------------------------------------------------------------------------------------------------------------------------------------|
| 4601  | 1 | Yes | 195877 | 5.70E-17  | NP_073614.1    | 4.90E-24  | RAB, member RAS oncogene family-like 5 isoform a                                        | nf                                                                                                                                                                                                                                                                |
| 83014 | 1 |     | 137945 | 9.00E-193 | NP_002799.3    | 8.90E-206 | proteasome 26S non-ATPase subunit 2                                                     | PF01851: Proteasome/cyclosome, regulatory subunit   PF01851: Proteasome/cyclosome, regulatory subunit   PF01851: Proteasome/cyclosome, regulatory subunit   PF01851: Proteasome/cyclosome, regulatory subunit   PF01851: Proteasome/cyclosome, regulatory subunit |
| 49382 | 1 |     | 71905  | 8.80E-08  | NP_115993.3    | 6.40E-18  | abhydrolase domain-containing protein 1                                                 | nf                                                                                                                                                                                                                                                                |
| 61990 | 1 |     | 147457 | 1.60E-20  | NP_997555.1    | 7.40E-09  | GRIP1 associated protein 1 isoform 2                                                    | PF00211: Adenylyl cyclase class-3/4/guanylyl cyclase                                                                                                                                                                                                              |
| 48710 | 1 |     | 393582 | 1.40E-146 | NP_006286.1    | 1.30E-190 | valyl-tRNA synthetase                                                                   | PF00133: Aminoacyl-tRNA synthetase, class Ia   PF08264: Valyl/Leucyl/Isoleucyl-tRNA synthetase, class I, anticodon-binding                                                                                                                                        |
| 62706 | 1 |     | nf     | n/a       | NP_003557.2    | 1.50E-07  | early endosome antigen 1, 162kD                                                         | PF00169: Pleckstrin-like   PF02759: RUN                                                                                                                                                                                                                           |
| 51352 | 1 |     | nf     | n/a       | NP_981932.1    | 5.60E-07  | iodotyrosine dehalogenase 1                                                             | PF00881: Nitroreductase                                                                                                                                                                                                                                           |
| 36164 | 1 |     | 141272 | 3.60E-158 | NP_056988.3    | 5.70E-168 | eukaryotic translation initiation factor 5B                                             | PF00009: Protein synthesis factor, GTP-binding   PF03144: Translation elongation factor EFTu/EF1A, domain 2                                                                                                                                                       |
| 45945 | 1 |     | nf     | n/a       | nf             | n/a       | nf                                                                                      | nf                                                                                                                                                                                                                                                                |
| 78582 | 1 |     | nf     | n/a       | nf             | n/a       | nf                                                                                      | nf                                                                                                                                                                                                                                                                |
| 79908 | 1 |     | 172711 | 2.30E-12  | NP_116200.2    | 1.00E-17  | transforming growth factor beta regulator 1                                             | PF05964: FY-rich, N-terminal   PF05965: FY-rich, C-terminal                                                                                                                                                                                                       |
| 45355 | 1 |     | nf     | n/a       | nf             | n/a       | nf                                                                                      | nf                                                                                                                                                                                                                                                                |
| 52250 | 1 |     | 150075 | 2.80E-09  | NP_777612.1    | 9.70E-15  | hypothetical protein LOC285555                                                          | nf                                                                                                                                                                                                                                                                |
| 380   | 1 | Yes | 189109 | 5.20E-94  | NP_852091.1    | 4.40E-101 | coiled-coil domain containing 39                                                        | nf                                                                                                                                                                                                                                                                |
| 82341 | 1 |     | 155455 | 3.00E-34  | NP_000981.1    | 1.10E-31  | ribosomal protein L27a                                                                  | PF00256: Ribosomal protein L15                                                                                                                                                                                                                                    |
| 63901 | 1 |     | nf     | n/a       | nf             | n/a       | nf                                                                                      | PF01063: Aminotransferase, class IV                                                                                                                                                                                                                               |
| 81857 | 1 |     | nf     | n/a       | NP_060795.1    | 2.10E-15  | hypothetical protein LOC203228 isoform a                                                | nf                                                                                                                                                                                                                                                                |
| 45002 | 1 | Yes | 98642  | 7.80E-36  | NP_060480.1    | 1.30E-46  | estrogen-related receptor beta like 1                                                   | PF10498: Intra-flagellar transport protein 57                                                                                                                                                                                                                     |
| 32656 | 1 |     | 196947 | 8.00E-98  | NP_004659.2    | 9.10E-126 | maltase-glucoamylase                                                                    | PF01055: Glycoside hydrolase, family 31                                                                                                                                                                                                                           |
| 80100 | 1 |     | nf     | n/a       | nf             | n/a       | nf                                                                                      | nf                                                                                                                                                                                                                                                                |
| 32474 | 1 |     | 287617 | 1.80E-80  | NP_036450.1    | 7.00E-64  | leucine zipper-EF-hand containing transmembrane protein 1                               | PF07766: LETM1-like   PF00036: Calcium-binding EF-hand                                                                                                                                                                                                            |
| 66832 | 1 |     | 168908 | 1.70E-54  | NP_001034842.2 | 2.50E-71  | echinoderm microtubule associated protein like 6                                        | PF00400: WD40 repeat   PF00400: WD40 repeat                                                                                                                                                                                                                       |
| 39446 | 1 |     | 191758 | 2.80E-24  | NP_000985.1    | 1.50E-22  | ribosomal protein L32                                                                   | PF01655: Ribosomal protein L32e                                                                                                                                                                                                                                   |
| 63764 | 1 | Yes | 183240 | 1.4e-310  | NP_056477.1    | 1.30E-298 | selective LIM binding factor homolog                                                    | nf                                                                                                                                                                                                                                                                |
| 64367 | 1 |     | nf     | n/a       | nf             | n/a       | nf                                                                                      | nf                                                                                                                                                                                                                                                                |
| 70007 | 1 |     | nf     | n/a       | NP_002060.4    | 2.80E-30  | guanine nucleotide binding protein (G protein), alpha inhibiting activity polypeptide 1 | PF00503: Guanine nucleotide binding protein (G-protein), alpha subunit                                                                                                                                                                                            |
| 66643 | 1 | Yes | 114106 | 3.70E-45  | NP_002517.1    | 7.20E-35  | 5' nucleotidase, ecto                                                                   | PF00149: Metallophosphoesterase   PF02872: 5'-Nucleotidase, C-terminal                                                                                                                                                                                            |
| 50077 | 1 |     | nf     | n/a       | nf             | n/a       | nf                                                                                      | nf                                                                                                                                                                                                                                                                |
| 83081 | 1 |     | nf     | n/a       | nf             | n/a       | nf                                                                                      | nf                                                                                                                                                                                                                                                                |
| 36700 | 1 |     | 131550 | 6.10E-18  | NP_005125.1    | 2.70E-63  | protein phosphatase 4, regulatory subunit 1 isoform b                                   | PF02985: HEAT   PF02985: HEAT   PF02985: HEAT   PF02985: HEAT   PF02985: HEAT                                                                                                                                                                                     |
| 60892 | 1 |     | 421037 | 8.40E-39  | NP_742128.1    | 8.70E-34  | potassium voltage-gated channel, shaker-related subfamily, beta member 2 isoform 2      | PF00248: Aldo/keto reductase                                                                                                                                                                                                                                      |
| 79521 | 1 |     | 145485 | 1.30E-19  | NP_056377.1    | 9.80E-29  | UBX domain containing 7                                                                 | PF02809: Ubiquitin interacting motif   PF00789: UBX                                                                                                                                                                                                               |
| 54755 | 1 |     | 140045 | 8.90E-67  | NP_066289.2    | 1.60E-66  | ubiquitin C                                                                             | PF00240: Ubiquitin   PF00240: Ubiquitin                                                                                                                                                                                                                           |
| 79700 | 1 |     | 148829 | 1.30E-96  | NP_006411.2    | 1.30E-181 | ADP-ribosylation factor guanine nucleotide-exchange factor 2                            | PF01369: SEC7-like   PF09324: Protein of unknown function DUF1981, SEC7 associated                                                                                                                                                                                |
| 71591 | 1 |     | nf     | n/a       | NP_976328.2    | 8.10E-16  | E2F transcription factor 7                                                              | PF02319: Transcription factor E2F/dimerisation partner (TDP)   PF02319: Transcription factor E2F/dimerisation partner (TDP)                                                                                                                                       |
| 70051 | 1 | Yes | 193577 | 2.50E-31  | NP_872383.1    | 3.50E-11  | outer dense fiber of sperm tails 3-like 2                                               | nf                                                                                                                                                                                                                                                                |
| 63598 | 1 |     | nf     | n/a       | nf             | n/a       | nf                                                                                      | nf                                                                                                                                                                                                                                                                |
| 78148 | 1 |     | 419259 | 2.30E-33  | nf             | n/a       | nf                                                                                      | PF00082: Peptidase S8 and S53, subtilisin, kexin, sedolisin                                                                                                                                                                                                       |
| 80259 | 1 | Yes | 130394 | 1.20E-20  | NP_057092.2    | 1.50E-29  | dynein 2 light intermediate chain isoform 1                                             | nf                                                                                                                                                                                                                                                                |
| 73968 | 1 |     | 297357 | 8.60E-14  | NP_114162.2    | 3.40E-18  | tetratricopeptide repeat domain 29                                                      | nf                                                                                                                                                                                                                                                                |
| 49224 | 1 |     | nf     | n/a       | nf             | n/a       | nf                                                                                      | nf                                                                                                                                                                                                                                                                |

|       |   |     |        |           |                |           |                                                                              |                                                                                                                                                                                                                                                                                                                                                                                                                                                                                                     |
|-------|---|-----|--------|-----------|----------------|-----------|------------------------------------------------------------------------------|-----------------------------------------------------------------------------------------------------------------------------------------------------------------------------------------------------------------------------------------------------------------------------------------------------------------------------------------------------------------------------------------------------------------------------------------------------------------------------------------------------|
| 63235 | 1 |     | 284442 | 6.40E-21  | NP_002151.2    | 7.70E-49  | tenascin C precursor                                                         | PF01436: NHL repeat   PF01436: NHL repeat   PF01436: NHL repeat   PF07974: EGF, extracellular   PF07974: EGF, extracellular |
| 59012 | 1 |     | nf     | n/a       | NP_061897.1    | 9.70E-26  | HEAT repeat containing 5B                                                    | nf                                                                                                                                                                                                                                                                                                                                                                                                                                                                                                  |
| 51044 | 1 |     | nf     | n/a       | nf             | n/a       | nf                                                                           | nf                                                                                                                                                                                                                                                                                                                                                                                                                                                                                                  |
| 78215 | 1 |     | 191319 | 2.10E-129 | NP_001484.1    | 3.50E-133 | GDP dissociation inhibitor 1                                                 | PF00996: Rab GTPase activator                                                                                                                                                                                                                                                                                                                                                                                                                                                                       |
| 79232 | 1 | Yes | 188612 | 1.70E-102 | NP_075462.3    | 7.90E-111 | dynein, axonemal, intermediate polypeptide 2                                 | nf                                                                                                                                                                                                                                                                                                                                                                                                                                                                                                  |
| 29188 | 1 | Yes | 145396 | 2.40E-99  | NP_653269.3    | 6.70E-98  | WD repeat domain 66                                                          | nf                                                                                                                                                                                                                                                                                                                                                                                                                                                                                                  |
| 79626 | 1 | Yes | 185392 | 1.10E-23  | NP_056465.2    | 9.00E-29  | TNF receptor-associated factor 3 interacting protein 1 isoform 1             | PF10243: Microtubule-binding protein MIP-T3                                                                                                                                                                                                                                                                                                                                                                                                                                                         |
| 83175 | 1 |     | 162845 | 4.40E-42  | NP_036555.1    | 5.80E-44  | ribosomal protein L13a                                                       | PF00572: Ribosomal protein L13                                                                                                                                                                                                                                                                                                                                                                                                                                                                      |
| 80363 | 1 |     | 120423 | 1.50E-09  | NP_004954.2    | 2.30E-06  | guanylate cyclase 2C                                                         | PF08376: Nitrate and nitrite sensing   PF00211: Adenylyl cyclase class-3/4/guanylyl cyclase                                                                                                                                                                                                                                                                                                                                                                                                         |
| 83261 | 1 |     | 380549 | 1.80E-22  | NP_055112.2    | 1.30E-53  | ETHE1 protein                                                                | PF00753: Beta-lactamase-like                                                                                                                                                                                                                                                                                                                                                                                                                                                                        |
| 74980 | 1 |     | nf     | n/a       | NP_006176.2    | 3.50E-09  | nuclear mitotic apparatus protein 1                                          | nf                                                                                                                                                                                                                                                                                                                                                                                                                                                                                                  |
| 34772 | 1 |     | 179025 | 7.10E-42  | NP_258412.1    | 4.40E-39  | inosine triphosphatase isoform a                                             | PF01725: Ham1-like protein                                                                                                                                                                                                                                                                                                                                                                                                                                                                          |
| 78103 | 1 |     | 2332   | 4.80E-06  | NP_620073.2    | 1.10E-63  | guanine nucleotide binding protein, alpha activating polypeptide O isoform b | PF00503: Guanine nucleotide binding protein (G-protein), alpha subunit                                                                                                                                                                                                                                                                                                                                                                                                                              |
| 52811 | 1 |     | nf     | n/a       | nf             | n/a       | nf                                                                           | nf                                                                                                                                                                                                                                                                                                                                                                                                                                                                                                  |
| 76504 | 1 |     | 120079 | 8.60E-08  | NP_085096.1    | 2.20E-51  | sirtuin 2 isoform 2                                                          | PF02146: Silent information regulator protein Sir2                                                                                                                                                                                                                                                                                                                                                                                                                                                  |
| 47729 | 1 |     | nf     | n/a       | nf             | n/a       | nf                                                                           | nf                                                                                                                                                                                                                                                                                                                                                                                                                                                                                                  |
| 79803 | 1 |     | nf     | n/a       | nf             | n/a       | nf                                                                           | nf                                                                                                                                                                                                                                                                                                                                                                                                                                                                                                  |
| 82900 | 1 |     | 126528 | 3.20E-101 | NP_037473.3    | 3.20E-107 | Obg-like ATPase 1 isoform 1                                                  | PF01926: GTP-binding protein, HSR1-related   PF06071: Protein of unknown function DUF933                                                                                                                                                                                                                                                                                                                                                                                                            |
| 74757 | 1 |     | 184661 | 8.50E-08  | NP_037534.3    | 5.80E-09  | fatty acid desaturase 1                                                      | PF00173: Cytochrome b5                                                                                                                                                                                                                                                                                                                                                                                                                                                                              |
| 80180 | 1 |     | 186878 | 7.50E-41  | NP_001129521.2 | 7.20E-21  | leishmanolysin-like isoform 1                                                | PF01457: Peptidase M8, leishmanolysin                                                                                                                                                                                                                                                                                                                                                                                                                                                               |
| 45058 | 1 |     | 24512  | 1.40E-58  | NP_079143.3    | 4.70E-37  | KPL2 protein isoform 1                                                       | nf                                                                                                                                                                                                                                                                                                                                                                                                                                                                                                  |
| 59665 | 1 |     | 78109  | 2.70E-10  | NP_000984.1    | 1.10E-12  | ribosomal protein L31 isoform 1                                              | PF01198: Ribosomal protein L31e                                                                                                                                                                                                                                                                                                                                                                                                                                                                     |
| 67195 | 1 |     | nf     | n/a       | nf             | n/a       | nf                                                                           | nf                                                                                                                                                                                                                                                                                                                                                                                                                                                                                                  |
| 77359 | 1 |     | nf     | n/a       | nf             | n/a       | nf                                                                           | nf                                                                                                                                                                                                                                                                                                                                                                                                                                                                                                  |
| 80987 | 1 |     | 64643  | 3.60E-14  | NP_751943.1    | 8.80E-14  | kelch domain containing 1                                                    | PF01344: Kelch repeat type 1   PF01344: Kelch repeat type 1   PF01344: Kelch repeat type 1   PF07646: Kelch repeat type 2   PF01344: Kelch repeat type 1                                                                                                                                                                                                                                                                                                                                            |
| 69338 | 1 |     | nf     | n/a       | nf             | n/a       | nf                                                                           | nf                                                                                                                                                                                                                                                                                                                                                                                                                                                                                                  |
| 73610 | 1 |     | nf     | n/a       | nf             | n/a       | nf                                                                           | nf                                                                                                                                                                                                                                                                                                                                                                                                                                                                                                  |
| 65812 | 1 |     | nf     | n/a       | nf             | n/a       | nf                                                                           | nf                                                                                                                                                                                                                                                                                                                                                                                                                                                                                                  |
| 56351 | 1 |     | 159554 | 4.00E-55  | NP_004057.1    | 5.40E-57  | centrin 1                                                                    | PF00036: Calcium-binding EF-hand   PF00036: Calcium-binding EF-hand   PF00036: Calcium-binding EF-hand   PF00036: Calcium-binding EF-hand                                                                                                                                                                                                                                                                                                                                                           |
| 81954 | 1 |     | nf     | n/a       | nf             | n/a       | nf                                                                           | nf                                                                                                                                                                                                                                                                                                                                                                                                                                                                                                  |
| 81194 | 1 |     | nf     | n/a       | nf             | n/a       | nf                                                                           | nf                                                                                                                                                                                                                                                                                                                                                                                                                                                                                                  |
| 78039 | 1 |     | nf     | n/a       | NP_071345.2    | 2.20E-09  | PBX/knotted 1 homeobox 2                                                     | nf                                                                                                                                                                                                                                                                                                                                                                                                                                                                                                  |
| 34640 | 1 |     | 174103 | 8.40E-55  | NP_066952.1    | 3.00E-12  | pyrophosphatase 1                                                            | PF00719: Inorganic pyrophosphatase                                                                                                                                                                                                                                                                                                                                                                                                                                                                  |
| 80494 | 1 |     | 194063 | 1.00E-97  | NP_078836.1    | 1.80E-145 | acyl-CoA synthetase short-chain family member 3                              | PF00501: AMP-dependent synthetase and ligase                                                                                                                                                                                                                                                                                                                                                                                                                                                        |
| 81635 | 1 |     | nf     | n/a       | nf             | n/a       | nf                                                                           | nf                                                                                                                                                                                                                                                                                                                                                                                                                                                                                                  |
| 80249 | 1 |     | 190633 | 1.50E-13  | NP_078934.3    | 3.40E-71  | importin 4                                                                   | PF03810: Importin-beta, N-terminal   PF02985: HEAT   PF02985: HEAT   PF02985: HEAT   PF02985: HEAT                                                                                                                                                                                                                                                                                                                                                                                                  |
| 78612 | 1 |     | 141319 | 4.20E-147 | NP_001055.1    | 3.00E-30  | transketolase isoform 1                                                      | PF00456: Transketolase, N-terminal   PF02779: Transketolase, central region   PF02780: Transketolase, C-terminal                                                                                                                                                                                                                                                                                                                                                                                    |
| 78847 | 1 |     | 421068 | 1.80E-126 | NP_004651.2    | 6.50E-124 | DEAD (Asp-Glu-Ala-Asp) box polypeptide 3, Y-linked                           | PF00270: DNA/RNA helicase, DEAD/DEAH box type, N-terminal   PF00271: DNA/RNA helicase, C-terminal                                                                                                                                                                                                                                                                                                                                                                                                   |
| 79189 | 1 |     | 195584 | 1.70E-72  | NP_006004.2    | 9.70E-74  | ribosomal protein L10                                                        | PF00252: Ribosomal protein L16                                                                                                                                                                                                                                                                                                                                                                                                                                                                      |
| 81288 | 1 |     | nf     | n/a       | NP_004300.1    | 1.30E-28  | Rho GDP dissociation inhibitor (GDI) alpha                                   | PF02115: RHO protein GDP dissociation inhibitor                                                                                                                                                                                                                                                                                                                                                                                                                                                     |
| 50947 | 1 |     | nf     | n/a       | NP_055111.1    | 1.20E-07  | calpain 7                                                                    | nf                                                                                                                                                                                                                                                                                                                                                                                                                                                                                                  |
| 34873 | 1 |     | 181887 | 5.20E-07  | nf             | n/a       | nf                                                                           | PF00235: Profilin/allergen                                                                                                                                                                                                                                                                                                                                                                                                                                                                          |
| 77826 | 1 |     | nf     | n/a       | NP_056000.1    | 8.60E-14  | Cdc42 guanine exchange factor 9                                              | nf                                                                                                                                                                                                                                                                                                                                                                                                                                                                                                  |
| 71179 | 1 |     | nf     | n/a       | nf             | n/a       | nf                                                                           | nf                                                                                                                                                                                                                                                                                                                                                                                                                                                                                                  |
| 78273 | 1 |     | 82172  | 1.00E-17  | NP_000994.1    | 1.30E-14  | ribosomal protein P1 isoform 1                                               | PF00428: Ribosomal protein 60S                                                                                                                                                                                                                                                                                                                                                                                                                                                                      |
| 55791 | 1 |     | 140045 | 2.10E-74  | NP_066289.2    | 2.10E-151 | ubiquitin C                                                                  | PF00240: Ubiquitin   PF00240: Ubiquitin   PF00240: Ubiquitin   PF00240: Ubiquitin                                                                                                                                                                                                                                                                                                                                                                                                                   |
| 75436 | 1 |     | nf     | n/a       | nf             | n/a       | nf                                                                           | nf                                                                                                                                                                                                                                                                                                                                                                                                                                                                                                  |



|       |   |     |        |           |                |           |                                                                                    |                                                                                                                                                                                                                                                                                                      |
|-------|---|-----|--------|-----------|----------------|-----------|------------------------------------------------------------------------------------|------------------------------------------------------------------------------------------------------------------------------------------------------------------------------------------------------------------------------------------------------------------------------------------------------|
| 59637 | 1 | Yes | 128114 | 3.90E-144 | NP_659491.4    | 1.30E-135 | WD40-repeat protein upregulated in HCC isoform b                                   | PF00400: WD40 repeat   PF00400: WD40 repeat   PF00400: WD40 repeat                                                                                                                                                                                                                                   |
| 61455 | 1 |     | 189584 | 8.10E-06  | nf             | n/a       | nf                                                                                 | PF02197: cAMP-dependent protein kinase regulator, type II PKA R subunit                                                                                                                                                                                                                              |
| 71175 | 1 |     | 400743 | 6.70E-19  | NP_849172.2    | 4.70E-26  | NOD3 protein                                                                       | PF00560: Leucine-rich repeat                                                                                                                                                                                                                                                                         |
| 54734 | 1 |     | 188942 | 1.20E-46  | NP_001958.2    | 1.30E-48  | eukaryotic translation initiation factor 4A2                                       | PF00270: DNA/RNA helicase, DEAD/DEAH box type, N-terminal                                                                                                                                                                                                                                            |
| 51975 | 1 |     | nf     | n/a       | nf             | n/a       | nf                                                                                 | nf                                                                                                                                                                                                                                                                                                   |
| 38344 | 1 |     | 376728 | 2.50E-117 | NP_003671.1    | 4.10E-43  | tyrosyl-tRNA synthetase                                                            | PF00579: Aminoacyl-tRNA synthetase, class Ib                                                                                                                                                                                                                                                         |
| 37722 | 1 |     | 191903 | 2.40E-224 | NP_695012.1    | 3.30E-270 | ubiquitin-activating enzyme E1                                                     | PF00899: UBA/THIF-type NAD/FAD binding fold   PF00899: UBA/THIF-type NAD/FAD binding fold   PF10585: Ubiquitin-activating enzyme active site   PF02134: Ubiquitin-activating enzyme repeat   PF02134: Ubiquitin-activating enzyme repeat   PF09358: Ubiquitin-activating enzyme e1 C-terminal domain |
| 79747 | 1 |     | nf     | n/a       | NP_758953.1    | 2.40E-12  | hypothetical protein LOC145376                                                     | nf                                                                                                                                                                                                                                                                                                   |
| 51126 | 1 |     | nf     | n/a       | nf             | n/a       | nf                                                                                 | nf                                                                                                                                                                                                                                                                                                   |
| 60048 | 1 |     | 195585 | 2.50E-55  | NP_009035.3    | 2.50E-59  | ribosomal protein L10a                                                             | PF00687: Ribosomal protein L1                                                                                                                                                                                                                                                                        |
| 68988 | 1 |     | nf     | n/a       | nf             | n/a       | nf                                                                                 | nf                                                                                                                                                                                                                                                                                                   |
| 66818 | 1 |     | nf     | n/a       | NP_149101.1    | 1.30E-16  | AIG2-like domain 1                                                                 | PF06094: AIG2-like                                                                                                                                                                                                                                                                                   |
| 69743 | 1 |     | nf     | n/a       | nf             | n/a       | nf                                                                                 | nf                                                                                                                                                                                                                                                                                                   |
| 53120 | 1 |     | nf     | n/a       | NP_001129396.1 | 1.50E-12  | von Willebrand factor D and EGF domains                                            | PF00188: SCP-like extracellular   PF07974: EGF, extracellular   PF07974: EGF, extracellular   PF07974: EGF, extracellular                                                                                                                                                                            |
| 81941 | 1 |     | 193661 | 7.80E-20  | NP_055300.1    | 3.10E-13  | prostaglandin-D synthase                                                           | PF02798: Glutathione S-transferase, N-terminal   PF00043: Glutathione S-transferase, C-terminal                                                                                                                                                                                                      |
| 36951 | 1 |     | 184170 | 1.20E-37  | NP_002873.1    | 3.20E-36  | RAN binding protein 1                                                              | PF00638: Ran Binding Protein 1                                                                                                                                                                                                                                                                       |
| 73592 | 1 |     | nf     | n/a       | nf             | n/a       | nf                                                                                 | nf                                                                                                                                                                                                                                                                                                   |
| 73783 | 1 |     | 392133 | 2.90E-08  | nf             | n/a       | nf                                                                                 | nf                                                                                                                                                                                                                                                                                                   |
| 39045 | 1 |     | 191776 | 1.00E-74  | NP_001000.2    | 2.00E-73  | ribosomal protein S5                                                               | PF00177: Ribosomal protein S7                                                                                                                                                                                                                                                                        |
| 78491 | 1 |     | 420861 | 6.70E-149 | NP_055568.3    | 3.60E-151 | BMS1-like, ribosome assembly protein                                               | PF08142: AARP2CN   PF04950: Protein of unknown function DUF663                                                                                                                                                                                                                                       |
| 67649 | 1 |     | 121702 | 2.60E-11  | NP_001128582.1 | 8.90E-10  | DnaJ (Hsp40) homolog, subfamily A, member 3 isoform 2                              | PF00226: Heat shock protein DnaJ, N-terminal                                                                                                                                                                                                                                                         |
| 71354 | 1 |     | nf     | n/a       | nf             | n/a       | nf                                                                                 | nf                                                                                                                                                                                                                                                                                                   |
| 55551 | 1 |     | 184847 | 8.00E-82  | NP_002781.2    | 6.20E-79  | proteasome alpha 5 subunit                                                         | PF10584: Proteasome subunit A N-terminal signature   PF00227: 20S proteasome, A and B subunits                                                                                                                                                                                                       |
| 44967 | 1 | Yes | 152806 | 9.70E-38  | NP_060835.1    | 1.20E-41  | meiosis-specific nuclear structural 1                                              | nf                                                                                                                                                                                                                                                                                                   |
| 64053 | 1 | Yes | 138649 | 1.90E-18  | NP_113661.2    | 1.20E-29  | intraflagellar transport 81-like isoform 2                                         | nf                                                                                                                                                                                                                                                                                                   |
| 82821 | 1 |     | 114649 | 3.20E-85  | NP_003959.3    | 1.40E-99  | ubiquitin-activating enzyme 3 isoform 1                                            | PF00899: UBA/THIF-type NAD/FAD binding fold   PF02134: Ubiquitin-activating enzyme repeat   PF08825: E2 binding                                                                                                                                                                                      |
| 56360 | 1 |     | 152438 | 5.30E-14  | NP_000837.3    | 4.60E-12  | glutathione S-transferase alpha 2                                                  | PF02798: Glutathione S-transferase, N-terminal   PF00043: Glutathione S-transferase, C-terminal                                                                                                                                                                                                      |
| 70637 | 1 |     | nf     | n/a       | NP_001035197.1 | 1.60E-11  | mutL homolog 3 isoform 1                                                           | PF08676: MutL, C-terminal, dimerisation                                                                                                                                                                                                                                                              |
| 61077 | 1 |     | nf     | n/a       | nf             | n/a       | nf                                                                                 | PF00651: BTB/POZ                                                                                                                                                                                                                                                                                     |
| 66714 | 1 |     | nf     | n/a       | nf             | n/a       | nf                                                                                 | nf                                                                                                                                                                                                                                                                                                   |
| 67163 | 1 |     | 195613 | 1.30E-17  | NP_003320.2    | 4.30E-23  | thioredoxin                                                                        | PF00085: Thioredoxin domain   PF00789: UBX                                                                                                                                                                                                                                                           |
| 73943 | 1 |     | 347422 | 9.30E-13  | NP_006401.3    | 1.60E-17  | HIV-1 Tat interactive protein 2, 30kDa isoform b                                   | nf                                                                                                                                                                                                                                                                                                   |
| 75841 | 1 |     | nf     | n/a       | nf             | n/a       | nf                                                                                 | nf                                                                                                                                                                                                                                                                                                   |
| 59795 | 1 |     | nf     | n/a       | NP_001034200.1 | 7.70E-14  | tripartite motif-containing 71                                                     | PF00643: Zinc finger, B-box   PF01436: NHL repeat   PF01436: NHL repeat   PF01436: NHL repeat   PF01436: NHL repeat                                                                                                                                                                                  |
| 83064 | 1 | Yes | 77703  | 4.90E-27  | NP_056468.1    | 1.20E-29  | RIB43A domain with coiled-coils 2                                                  | PF05914: RIB43A                                                                                                                                                                                                                                                                                      |
| 62763 | 1 |     | 293546 | 3.40E-35  | NP_742128.1    | 1.60E-32  | potassium voltage-gated channel, shaker-related subfamily, beta member 2 isoform 2 | PF00248: Aldo/keto reductase                                                                                                                                                                                                                                                                         |
| 63237 | 1 |     | nf     | n/a       | nf             | n/a       | nf                                                                                 | nf                                                                                                                                                                                                                                                                                                   |
| 58925 | 1 |     | nf     | n/a       | NP_055191.2    | 3.40E-165 | cytoplasmic FMR1 interacting protein 2                                             | PF05994: Cytoplasmic fragile X mental retardation protein interacting protein                                                                                                                                                                                                                        |
| 54368 | 1 |     | 120324 | 5.20E-13  | NP_057062.1    | 2.10E-13  | TNNI3 interacting kinase isoform b                                                 | PF07714: Tyrosine protein kinase                                                                                                                                                                                                                                                                     |
| 79448 | 1 |     | 126189 | 3.80E-123 | NP_000958.1    | 1.40E-127 | ribosomal protein L3 isoform a                                                     | PF00297: Ribosomal protein L3                                                                                                                                                                                                                                                                        |
| 65473 | 1 |     | nf     | n/a       | NP_001129955.1 | 1.60E-06  | hypothetical protein LOC284067                                                     | nf                                                                                                                                                                                                                                                                                                   |
| 62234 | 1 |     | nf     | n/a       | nf             | n/a       | nf                                                                                 | nf                                                                                                                                                                                                                                                                                                   |
| 76540 | 1 |     | 196612 | 6.70E-36  | nf             | n/a       | nf                                                                                 | PF01293: Phosphoenolpyruvate carboxykinase, ATP-utilising                                                                                                                                                                                                                                            |
| 69737 | 1 |     | nf     | n/a       | NP_653303.2    | 3.50E-08  | hypothetical protein LOC149499                                                     | nf                                                                                                                                                                                                                                                                                                   |
| 79230 | 1 |     | nf     | n/a       | nf             | n/a       | nf                                                                                 | nf                                                                                                                                                                                                                                                                                                   |
| 56305 | 1 |     | 127172 | 1.60E-06  | nf             | n/a       | nf                                                                                 | PF01459: Porin, eukaryotic type                                                                                                                                                                                                                                                                      |
| 80937 | 1 |     | nf     | n/a       | nf             | n/a       | nf                                                                                 | PF00646: Cyclin-like F-box                                                                                                                                                                                                                                                                           |
| 69783 | 1 |     | nf     | n/a       | nf             | n/a       | nf                                                                                 | nf                                                                                                                                                                                                                                                                                                   |
| 72989 | 1 |     | 114898 | 1.60E-07  | NP_115737.1    | 2.00E-07  | THO complex 3                                                                      | PF00400: WD40 repeat   PF00400: WD40 repeat                                                                                                                                                                                                                                                          |
| 38811 | 1 |     | 320624 | 1.80E-13  | NP_057216.2    | 2.60E-11  | myelin expression factor 2                                                         | PF00076: RNA recognition motif, RNP-1                                                                                                                                                                                                                                                                |
| 76059 | 1 |     | nf     | n/a       | nf             | n/a       | nf                                                                                 | nf                                                                                                                                                                                                                                                                                                   |
| 65386 | 1 |     | nf     | n/a       | nf             | n/a       | nf                                                                                 | nf                                                                                                                                                                                                                                                                                                   |

|       |   |     |        |           |                |           |                                                          |                                                                                                                                                                                                    |
|-------|---|-----|--------|-----------|----------------|-----------|----------------------------------------------------------|----------------------------------------------------------------------------------------------------------------------------------------------------------------------------------------------------|
| 63280 | 1 | Yes | 24421  | 4.70E-132 | NP_006522.2    | 3.00E-127 | intraflagellar transport 88 homolog isoform 2            | PF00515: Tetratricopeptide TPR_1                       |
| 62959 | 1 | Yes | 192170 | 1.20E-87  | NP_065930.2    | 1.40E-51  | coiled-coil domain containing 146                        | nf                                                                                                                                                                                                 |
| 45350 | 1 |     | 413646 | 2.00E-18  | NP_000050.2    | 5.50E-51  | breast cancer 2, early onset                             | PF09169: BRCA2, helical   PF09103: BRCA2, oligonucleotide/oligosaccharide-binding 1                                                                                                                |
| 80902 | 1 |     | nf     | n/a       | nf             | n/a       | nf                                                       | nf                                                                                                                                                                                                 |
| 79216 | 1 |     | nf     | n/a       | nf             | n/a       | nf                                                       | nf                                                                                                                                                                                                 |
| 62660 | 1 |     | 60490  | 6.50E-16  | NP_001782.1    | 2.50E-43  | cell division cycle 42 isoform 1                         | PF00071: Ras                                                                                                                                                                                       |
| 67392 | 1 |     | nf     | n/a       | nf             | n/a       | nf                                                       | nf                                                                                                                                                                                                 |
| 78419 | 1 |     | 380622 | 4.90E-120 | NP_001986.2    | 1.20E-114 | acyl-CoA synthetase long-chain family member 1           | PF00501: AMP-dependent synthetase and ligase                                                                                                                                                       |
| 67691 | 1 |     | nf     | n/a       | NP_079228.4    | 8.60E-25  | hypothetical protein LOC80017 isoform a                  | nf                                                                                                                                                                                                 |
| 88119 | 1 |     | 283552 | 1.50E-40  | NP_060887.2    | 2.40E-23  | adenylate cyclase 10                                     | PF00211: Adenylyl cyclase class-3/4/guanylyl cyclase                                                                                                                                               |
| 58163 | 1 |     | nf     | n/a       | nf             | n/a       | nf                                                       | PF02205: Actin-binding WH2                                                                                                                                                                         |
| 61418 | 1 |     | 77886  | 1.40E-35  | NP_776254.2    | 5.50E-37  | MORN repeat containing 3                                 | PF00225: Kinesin, motor region   PF02493: MORN motif   PF03671: Ubiquitin-like, Ufm1 |
| 81993 | 1 |     | 185792 | 2.50E-19  | NP_543136.1    | 3.10E-14  | testis-specific gene A2                                  | PF04969: CS   PF02493: MORN motif   PF02493: MORN motif   PF02493: MORN motif   PF02493: MORN motif                                                                                                |
| 59962 | 1 |     | 378877 | 5.90E-22  | NP_005498.1    | 1.20E-18  | cofilin 1 (non-muscle)                                   | PF00241: Actin-binding, cofilin/tropomyosin type                                                                                                                                                   |
| 33131 | 1 |     | 195599 | 2.30E-43  | NP_000963.1    | 1.10E-51  | ribosomal protein L7a                                    | PF01248: Ribosomal protein L7Ae/L30e/S12e/Gadd45                                                                                                                                                   |
| 52838 | 1 |     | 188144 | 3.90E-14  | NP_008819.1    | 2.10E-14  | calmodulin 1                                             | nf                                                                                                                                                                                                 |
| 80067 | 1 |     | nf     | n/a       | nf             | n/a       | nf                                                       | nf                                                                                                                                                                                                 |
| 63091 | 1 | Yes | 107835 | 9.20E-33  | NP_659484.3    | 5.60E-46  | oxidored-nitro domain-containing protein isoform 1       | PF10188: Organic solute transport protein 1                                                                                                                                                        |
| 59552 | 1 |     | nf     | n/a       | nf             | n/a       | nf                                                       | nf                                                                                                                                                                                                 |
| 35893 | 1 |     | 152525 | 1.70E-33  | NP_003330.1    | 6.30E-31  | ubiquitin-conjugating enzyme E2D 2 isoform 1             | PF00179: Ubiquitin-conjugating enzyme, E2                                                                                                                                                          |
| 82965 | 1 |     | 206048 | 4.80E-52  | NP_003784.2    | 8.00E-63  | cathepsin F                                              | PF08246: Proteinase inhibitor I29, cathepsin propeptide   PF00112: Peptidase C1A, papain C-terminal                                                                                                |
| 73911 | 1 |     | 106046 | 1.40E-31  | NP_000897.3    | 9.20E-37  | natriuretic peptide receptor 1                           | PF00989: PAS fold   PF00211: Adenylyl cyclase class-3/4/guanylyl cyclase                                                                                                                           |
| 88122 | 1 |     | 81259  | 5.30E-08  | NP_001782.1    | 6.50E-29  | cell division cycle 42 isoform 1                         | PF00071: Ras                                                                                                                                                                                       |
| 29287 | 1 |     | 26265  | 6.40E-57  | NP_000356.1    | 6.20E-56  | triosephosphate isomerase 1 isoform 1                    | PF00121: Triosephosphate isomerase                                                                                                                                                                 |
| 39155 | 1 |     | 377723 | 2.50E-85  | NP_075266.1    | 7.00E-103 | acyl-CoA synthetase long-chain family member 4 isoform 2 | PF00501: AMP-dependent synthetase and ligase                                                                                                                                                       |
| 44726 | 1 |     | 206042 | 7.70E-116 | NP_006829.1    | 9.50E-115 | methionyl aminopeptidase 2                               | PF00557: Peptidase M24, catalytic core                                                                                                                                                             |
| 34303 | 1 |     | 182183 | 9.80E-13  | NP_036465.2    | 2.60E-16  | c-myc binding protein                                    | nf                                                                                                                                                                                                 |
| 74109 | 1 |     | nf     | n/a       | nf             | n/a       | nf                                                       | PF00043: Glutathione S-transferase, C-terminal                                                                                                                                                     |
| 66740 | 1 |     | nf     | n/a       | nf             | n/a       | nf                                                       | nf                                                                                                                                                                                                 |
| 53758 | 1 |     | nf     | n/a       | nf             | n/a       | nf                                                       | nf                                                                                                                                                                                                 |
| 35026 | 1 |     | 184701 | 3.10E-167 | NP_006422.1    | 2.70E-165 | chaperonin containing TCP1, subunit 2                    | PF00118: Chaperonin Cpn60/TCP-1                                                                                                                                                                    |
| 33387 | 1 |     | 24114  | 1.50E-80  | NP_001605.1    | 1.40E-154 | actin, gamma 1 propeptide                                | PF00022: Actin/actin-like                                                                                                                                                                          |
| 81437 | 1 |     | nf     | n/a       | nf             | n/a       | nf                                                       | nf                                                                                                                                                                                                 |
| 59723 | 1 |     | nf     | n/a       | XP_002344344.1 | 1.50E-07  | PREDICTED: hypothetical protein, partial                 | nf                                                                                                                                                                                                 |
| 82086 | 1 |     | nf     | n/a       | nf             | n/a       | nf                                                       | nf                                                                                                                                                                                                 |
| 55800 | 1 |     | 205854 | 5.70E-56  | NP_001016.1    | 9.40E-60  | ribosomal protein S23                                    | PF00164: Ribosomal protein S12/S23                                                                                                                                                                 |
| 73065 | 1 |     | nf     | n/a       | nf             | n/a       | nf                                                       | nf                                                                                                                                                                                                 |
