# Supplementary material for: Ancestral centriole and flagella proteins identified by analysis ofNaegleriadifferentiation
Source: Oxford University Press journal article supplement (doi:10.1242/jcs.077453), 2010-11-02
Supplement: jcs077453tables3.pdf [file jcs077453tables3.pdf]

Table S3. Orthologs of pCCCs in different eukaryotes

| Common name      | Species                          | POC11          |        | Friggin/MOT37 |        | B9D2         |        | SSA3         |        | FOR20/MOT52  |        |
|------------------|----------------------------------|----------------|--------|---------------|--------|--------------|--------|--------------|--------|--------------|--------|
|                  |                                  | Accession      | Length | Accession     | Length | Accession    | Length | Accession    | Length | Accession    | Length |
| Human            | <i>Homo sapiens</i>              | Q9BR77         | 488    | Q8IYG6        | 542    | NP_085055    | 175    | NP_001128493 | 381    | NP_653201    | 174    |
| Mouse            | <i>Mus musculus</i>              | NP_080304      | 489    | NP_722472     | 552    | NP_742160    | 175    | NP_659166    | 381    | NP_079621    | 174    |
| Frog             | <i>Xenopus laevis</i>            | NP_001086567   | 496    | nf            | n/a    | NP_001085984 | 176    | NP_001084770 | 376    | NP_001090045 | 169    |
| Zebra fish       | <i>Danio rerio</i>               | NP_001020649.1 | 427    | XP_692700     | 569    | NP_001002394 | 175    | nf           | n/a    | XP_696350    | 146    |
| Sea anemone      | <i>Nematostella vectensis</i>    | EDO34896       | 453    | XP_001641243  | 446    | XP_001638897 | 175    | XP_001623228 | 310    | XP_001633880 | 168    |
| Trichoplax       | <i>Trichoplax adherins</i>       | XP_002108951   | 450    | XP_002108579  | 557    | XP_002109118 | 175    | XP_002114557 | 199    | XP_002108148 | 169    |
| Choanoflagellate | <i>Monosiga brevicola</i>        | XP_001743324   | 528    | XP_001746946  | 717    | XP_001742148 | 175    | nf           | n/a    | nf           | n/a    |
| Naegleria        | <i>Naegleria gruberi</i>         | EFC41717       | 387    | XP_002683426  | 613    | XP_002681671 | 181    | XP_002675911 | 290    | XP_002671358 | 335    |
| Green algae      | <i>chlamydomonas reinhardtii</i> | XP_001693122   | 451    | XP_001690181  | 735    | XP_001693128 | 176    | XP_001697124 | 699    | XP_001697797 | 133    |
| Paramecium       | <i>Paramecium tetraurelia</i>    | CAK72449       | 502    | XP_001442263  | 545    | XP_001432714 | 183    | XP_001427368 | 405    | XP_001449123 | 165    |
| Tetrahymena      | <i>Tetrahymena thermophila</i>   | XP_001023528   | 511    | XP_001017079  | 865    | XP_001010073 | 188    | XP_001033010 | 720    | XP_001032688 | 172    |

Species names, NCBI accessions, and protein lengths (number of amino acids) for each centrosome-localized pCCC are as indicated.

nf indicates no clear ortholog was identified in the given organism.
