# Supplementary figures and images for: Ancestral centriole and flagella proteins identified by analysis ofNaegleriadifferentiation
Source: Oxford University Press journal article supplement (doi:10.1242/jcs.077453), 2010-11-02

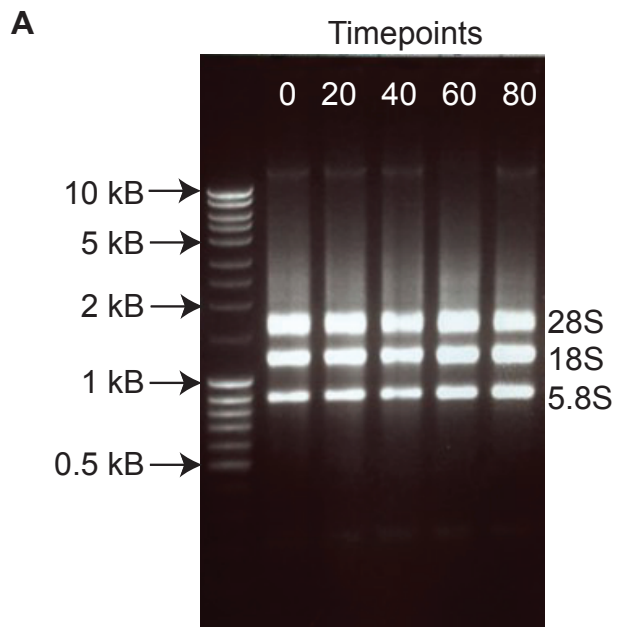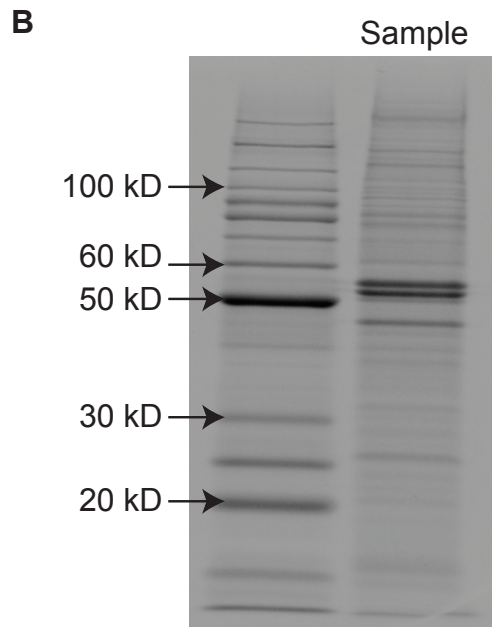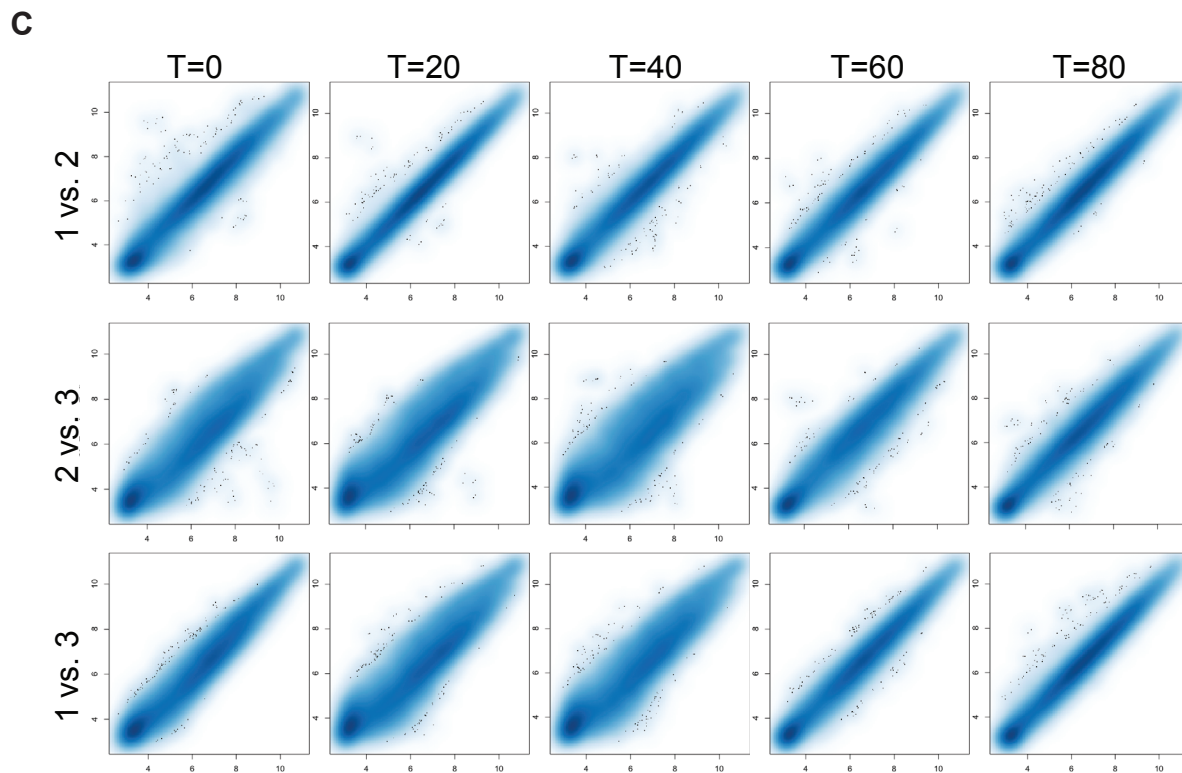

Supplement: jcs077453figs1.pdf [file jcs077453figs1.pdf]
